# Supplementary material for: Sheep skeletal muscle transcriptome analysis reveals muscle growth regulatory lncRNAs
Source: PeerJ. 2018 Apr 11;6:e4619. doi: 10.7717/peerj.4619 (PMC5899421; doi:10.7717/peerj.4619)
Supplement: Table S1 — Sequencing project and Biosample information were collected from NCBI SRA database. Data file filtering was performed with Trimmomatic-0.36. [file peerj-06-4619-s001.xlsx]

## Sheet: Sheet 1
Sequencing Project	GEO ID	Project Title	Species	Sample	Biosample title	Biosample id	Use in this study	breed	Gender	Age	Treatment	tissue	Raw reads	Type	Read Sequencing length	Sequencing	Clean reads	Mapped reads	Mapped rate	Unique Mapped reads	Unique Mapped rate
PRJNA335752	GSE84964	Comparative transcriptome profiling of longissimus muscle tissues from Qianhua Mutton Merino and Small Tail Han sheep	Sheep (Ovis aries)	M1	QHMM rep1	SAMN05461879	Differential expression analysis and Co-expression analysis	Qianhua Mutton Merino	female	1 year	All the experimental sheep were raised under the same environment with natural light and free access to food and water.	longissimus muscle	20182372	Single-end	180nt	Unknown	14544091	13197663	0.9074	11520686	0.7921
			Sheep (Ovis aries)	M2	QHMM rep2	SAMN05461878	Differential expression analysis and Co-expression analysis	Qianhua Mutton Merino	female	1 year	All the experimental sheep were raised under the same environment with natural light and free access to food and water.	longissimus muscle	18739823	Single-end	180nt	Unknown	13907241	11921587	0.8572	10249534	0.737
			Sheep (Ovis aries)	M3	QHMM rep3	SAMN05461877	Differential expression analysis and Co-expression analysis	Qianhua Mutton Merino	female	1 year	All the experimental sheep were raised under the same environment with natural light and free access to food and water.	longissimus muscle	17468288	Single-end	180nt	Unknown	13436822	12067260	0.898	10587441	0.7879
			Sheep (Ovis aries)	S1	STH rep1	SAMN05461876	Differential expression analysis and Co-expression analysis	Small Tail Han	female	1 year	All the experimental sheep were raised under the same environment with natural light and free access to food and water.	longissimus muscle	18524497	Single-end	180nt	Unknown	13975782	12346146	0.8834	10810871	0.7735
			Sheep (Ovis aries)	S2	STH rep2	SAMN05461881	Differential expression analysis and Co-expression analysis	Small Tail Han	female	1 year	All the experimental sheep were raised under the same environment with natural light and free access to food and water.	longissimus muscle	15694123	Single-end	180nt	Unknown	11947613	10363788	0.8675	8956641	0.7497
			Sheep (Ovis aries)	S3	STH rep3	SAMN05461880	Differential expression analysis and Co-expression analysis	Small Tail Han	female	1 year	All the experimental sheep were raised under the same environment with natural light and free access to food and water.	longissimus muscle	18470907	Single-end	180nt	Unknown	14207607	12501424	0.8799	11084599	0.7802
PRJNA185414	GSE43316	Next Generation Sequencing of different ovine muscle's Transcriptomes	Sheep (Ovis aries)	DP	Dorper sheep RNA-Seq	SAMN01883143	Differential expression analysis and Co-expression analysis	Dorper	female	11-month	The sheep were fed in stables. The room temperature was uncontrolled, and the environment was exposed to natural lighting.	biceps brachii	26397108	Paired-end	90nt	Illumina HiSeq 2000	26388659	25734228	0.9752	18720966	0.7094
			Sheep (Ovis aries)	SH	Small-tailed Han sheep RNA-Seq	SAMN01883144	Differential expression analysis and Co-expression analysis	Small Tail Han	female	11-month	The sheep were fed in stables. The room temperature was uncontrolled, and the environment was exposed to natural lighting.	biceps brachii	25132304	Paired-end	90nt	Illumina HiSeq 2000	25123271	24471609	0.9741	20090690	0.7997
PRJEB6169	N/A	Sheep Tissue Atlas	Sheep (Ovis aries)	RAMB	Sheep Tissue Atlas	SAMEA2474913	Co-expression analysis	Texel	male	adult	N/A	longissimus dorsi	29925431	Paired-end	151nt	Illumina HiSeq 2500	22966709	21517321	0.9368	13156296	0.5728
			Sheep (Ovis aries)	RAME	Sheep Tissue Atlas	SAMEA2474914	Co-expression analysis	Texel	male	adult	N/A	biceps	36603056	Paired-end	151nt	Illumina HiSeq 2500	25808734	24042150	0.9315	15594814	0.6042
			Sheep (Ovis aries)	EWEB	Sheep Tissue Atlas	SAMEA2474890	Co-expression analysis	Texel	female	adult	N/A	longissimus dorsi	39489936	Paired-end	151nt	Illumina HiSeq 2500	28990677	27879702	0.9617	22084959	0.7618
			Sheep (Ovis aries)	EWEE	Sheep Tissue Atlas	SAMEA2474891	Co-expression analysis	Texel	female	adult	N/A	biceps	51366221	Paired-end	151nt	Illumina HiSeq 2500	38767061	37263601	0.9612	26944029	0.695
			Sheep (Ovis aries)	LAMB	0989N0024; Ovis aries; Sheep Tissue Atlas	SAMEA2474869	Co-expression analysis	Texel	female	6-10 months	N/A	longissimus dorsi	71664033	Paired-end	151nt	Illumina HiSeq 2500	46712379	45256641	0.9688	28262367	0.605
			Sheep (Ovis aries)	LAME	0989N0025; Ovis aries; Sheep Tissue Atlas	SAMEA2474870	Co-expression analysis	Texel	female	6-10 months	N/A	biceps	91428175	Paired-end	151nt	Illumina HiSeq 2500	60878940	58858522	0.9668	37493622	0.6159
PRJNA223213	N/A	Ovis aries strain:crossbred Transcriptome or Gene expression	Sheep (Ovis aries)	nn1	6647.NN	SAMN02378479	Co-expression analysis	crossbred	male	45 days	Planned matings were conducted to produce all four possible genotypes with respect to the callipyge allele. All lambs were genotyped at the callipyge single nucleotide polymorphism and several microsatellite markers flanking the callipyge locus on chromosome 18.	pelvic limb	4870779	Paired-end	100nt	Illumina HiSeq 2000	4067793	3504747	0.8616	2177211	0.5352
			Sheep (Ovis aries)	nn2	6547.NN	SAMN02378480	Co-expression analysis	crossbred	female	45 days	Planned matings were conducted to produce all four possible genotypes with respect to the callipyge allele. All lambs were genotyped at the callipyge single nucleotide polymorphism and several microsatellite markers flanking the callipyge locus on chromosome 19.	pelvic limb	10584819	Paired-end	100nt	Illumina HiSeq 2000	9201765	8176770	0.8886	4534610	0.4928
			Sheep (Ovis aries)	nn3	6631.NN	SAMN02378481	Co-expression analysis	crossbred	female	45 days	Planned matings were conducted to produce all four possible genotypes with respect to the callipyge allele. All lambs were genotyped at the callipyge single nucleotide polymorphism and several microsatellite markers flanking the callipyge locus on chromosome 20.	pelvic limb	11712125	Paired-end	100nt	Illumina HiSeq 2000	10271305	9445760	0.9197	6424360	0.6255
			Sheep (Ovis aries)	nc1	6659.NC	SAMN02378482	Co-expression analysis	crossbred	male	45 days	Planned matings were conducted to produce all four possible genotypes with respect to the callipyge allele. All lambs were genotyped at the callipyge single nucleotide polymorphism and several microsatellite markers flanking the callipyge locus on chromosome 21.	pelvic limb	10659498	Paired-end	100nt	Illumina HiSeq 2000	9210909	8101845	0.8796	5992464	0.6506
			Sheep (Ovis aries)	nc2	6658.NC	SAMN02378483	Co-expression analysis	crossbred	female	45 days	Planned matings were conducted to produce all four possible genotypes with respect to the callipyge allele. All lambs were genotyped at the callipyge single nucleotide polymorphism and several microsatellite markers flanking the callipyge locus on chromosome 22.	pelvic limb	3858869	Paired-end	100nt	Illumina HiSeq 2000	3546681	3247450	0.9157	1955120	0.5513
			Sheep (Ovis aries)	nc3	6646.NC	SAMN02378484	Co-expression analysis	crossbred	female	45 days	Planned matings were conducted to produce all four possible genotypes with respect to the callipyge allele. All lambs were genotyped at the callipyge single nucleotide polymorphism and several microsatellite markers flanking the callipyge locus on chromosome 23.	pelvic limb	6176076	Paired-end	100nt	Illumina HiSeq 2000	5584981	5145172	0.9213	3482789	0.6236
			Sheep (Ovis aries)	cn1	6537.CN	SAMN02378485	Co-expression analysis	crossbred	female	45 days	Planned matings were conducted to produce all four possible genotypes with respect to the callipyge allele. All lambs were genotyped at the callipyge single nucleotide polymorphism and several microsatellite markers flanking the callipyge locus on chromosome 24.	pelvic limb	4697352	Paired-end	100nt	Illumina HiSeq 2000	4291020	4026703	0.9384	2786614	0.6494
			Sheep (Ovis aries)	cn2	6585.CN	SAMN02378486	Co-expression analysis	crossbred	male	45 days	Planned matings were conducted to produce all four possible genotypes with respect to the callipyge allele. All lambs were genotyped at the callipyge single nucleotide polymorphism and several microsatellite markers flanking the callipyge locus on chromosome 25.	pelvic limb	15262471	Paired-end	100nt	Illumina HiSeq 2000	13819341	12496227	0.9043	9411744	0.6811
			Sheep (Ovis aries)	cn3	6604.CN	SAMN02378487	Co-expression analysis	crossbred	female	45 days	Planned matings were conducted to produce all four possible genotypes with respect to the callipyge allele. All lambs were genotyped at the callipyge single nucleotide polymorphism and several microsatellite markers flanking the callipyge locus on chromosome 26.	pelvic limb	4354504	Paired-end	100nt	Illumina HiSeq 2000	3891781	3645958	0.9368	2474145	0.6357
			Sheep (Ovis aries)	cc1	6536.CC	SAMN02378488	Co-expression analysis	crossbred	male	45 days	Planned matings were conducted to produce all four possible genotypes with respect to the callipyge allele. All lambs were genotyped at the callipyge single nucleotide polymorphism and several microsatellite markers flanking the callipyge locus on chromosome 27.	pelvic limb	6665943	Paired-end	100nt	Illumina HiSeq 2000	5839703	5430211	0.9299	3167257	0.5424
			Sheep (Ovis aries)	cc2	6533.CC	SAMN02378489	Co-expression analysis	crossbred	female	45 days	Planned matings were conducted to produce all four possible genotypes with respect to the callipyge allele. All lambs were genotyped at the callipyge single nucleotide polymorphism and several microsatellite markers flanking the callipyge locus on chromosome 28.	pelvic limb	2897518	Paired-end	100nt	Illumina HiSeq 2000	2585801	2411606	0.9326	1479720	0.5722
			Sheep (Ovis aries)	cc3	6560.CC	SAMN02378490	Co-expression analysis	crossbred	male	45 days	Planned matings were conducted to produce all four possible genotypes with respect to the callipyge allele. All lambs were genotyped at the callipyge single nucleotide polymorphism and several microsatellite markers flanking the callipyge locus on chromosome 29.	pelvic limb	11079109	Paired-end	100nt	Illumina HiSeq 2000	9982605	8645246	0.866	5217162	0.5226
