# Supplementary material for: Sheep skeletal muscle transcriptome analysis reveals muscle growth regulatory lncRNAs
Source: PeerJ. 2018 Apr 11;6:e4619. doi: 10.7717/peerj.4619 (PMC5899421; doi:10.7717/peerj.4619)
Supplement: Table S2 — Differential expression analysis was performed with DESeq2. [file peerj-06-4619-s002.xlsx]

## Sheet: DEG analysis result
gene_id	type	baseMean	log2FoldChange	lfcSE	stat	pvalue	FDR
LOC101116336	coding	577.539	-2.96512	0.331412	-8.94693	3.65489e-19	7.84288e-16
FRZB	coding	326.539	-2.94505	0.200039	-14.7223	4.63352e-49	6.96002e-45
DKK2	coding	321.388	-2.91297	0.384803	-7.57003	3.73151e-14	3.29712e-11
PAQR9	coding	14.0734	-2.8099	0.429766	-6.5382	6.22625e-11	2.33811e-08
CCDC28B	coding	9.18194	-2.47945	0.457802	-5.41599	6.09522e-08	8.80349e-06
SNAI3	coding	59.0286	-2.46288	0.32868	-7.49323	6.71976e-14	5.3125e-11
METTL7B	coding	194.278	-2.4183	0.392542	-6.16062	7.24612e-10	2.13419e-07
GADL1	coding	1022.09	-2.38561	0.18354	-12.9978	1.25947e-38	7.43205e-35
GLP2R	coding	21.3746	-2.36323	0.416446	-5.67475	1.3889e-08	2.60784e-06
IGFBP5	coding	4965.01	-2.36028	0.267997	-8.80713	1.28387e-18	2.41063e-15
LOC105615770	coding	37.7933	-2.34915	0.423663	-5.54487	2.9418e-08	4.75148e-06
KY	coding	1163.37	-2.28194	0.368031	-6.2004	5.63212e-10	1.7625e-07
MAPK4	coding	23.5382	-2.2067	0.425823	-5.1822	2.19289e-07	2.49541e-05
TNFSF4	coding	25.9561	-2.17731	0.430568	-5.05682	4.2631e-07	4.54156e-05
SFRP2	coding	18.8876	-2.15436	0.383487	-5.61783	1.93375e-08	3.45796e-06
LRRN1	coding	39.9989	-2.138	0.366061	-5.84055	5.20276e-09	1.08542e-06
NREP	coding	800.294	-2.11217	0.33465	-6.31158	2.76196e-10	9.21943e-08
FOXO6	coding	68.4884	-2.11068	0.381835	-5.52774	3.24378e-08	5.07549e-06
METTL11B	coding	182.7	-2.08962	0.297509	-7.02372	2.16036e-12	1.24811e-09
LOC105615769	coding	26.2215	-2.06721	0.38489	-5.37091	7.83399e-08	1.08958e-05
LOC105606009	coding	22.0787	-2.05833	0.424108	-4.85332	1.2141e-06	0.000113981
LOC101119459	coding	186.761	-2.0452	0.301451	-6.78451	1.16484e-11	5.83234e-09
CHN2	coding	42.9109	-2.04498	0.331595	-6.16712	6.95463e-10	2.08931e-07
PPP1R3C	coding	2421.36	-2.04413	0.451844	-4.52397	6.069e-06	0.000436184
SHISA2	coding	373.557	-2.01015	0.278418	-7.2199	5.20263e-13	3.2562e-10
ST8SIA5	coding	221.518	-1.95639	0.353045	-5.54149	2.99917e-08	4.79261e-06
LOC101110740	coding	210.777	-1.9236	0.284232	-6.7677	1.30844e-11	6.34004e-09
AK4	coding	599.599	-1.92289	0.283095	-6.79241	1.10278e-11	5.71202e-09
WBSCR17	coding	31.5653	-1.91089	0.40638	-4.70221	2.57357e-06	0.000211244
CA3	coding	20607.2	-1.88684	0.317035	-5.95154	2.65635e-09	6.33349e-07
ITGB6	coding	154.307	-1.86799	0.360169	-5.18642	2.14378e-07	2.49541e-05
CARNMT1	coding	297.086	-1.82739	0.304537	-6.00055	1.96654e-09	4.84252e-07
TGM1	coding	23.9969	-1.81214	0.43559	-4.1602	3.17965e-05	0.00163646
SLC6A1	coding	70.8643	-1.8047	0.337343	-5.34975	8.80781e-08	1.19191e-05
DGAT2	coding	214.501	-1.80443	0.459233	-3.92923	8.5218e-05	0.0037211
GPAM	coding	165.359	-1.77958	0.35217	-5.05318	4.34509e-07	4.59631e-05
MSS51	coding	1111.49	-1.77489	0.304927	-5.82069	5.86045e-09	1.17373e-06
LOC101119572	coding	14.0864	-1.75928	0.457438	-3.84594	0.00012009	0.00481033
LOC101108071	coding	17.1596	-1.75673	0.454673	-3.86373	0.00011167	0.00453788
PGM2L1	coding	201.225	-1.75612	0.283402	-6.19656	5.77093e-10	1.76908e-07
SLC4A4	coding	55.7572	-1.74822	0.309452	-5.6494	1.61013e-08	2.91395e-06
LOC105605606	coding	5.23263	-1.74748	0.460811	-3.79218	0.000149331	0.00578498
FAM43B	coding	34.7975	-1.74721	0.339666	-5.14389	2.69103e-07	3.03924e-05
LOC101113341	coding	302.707	-1.74719	0.220382	-7.928	2.22699e-15	3.04106e-12
PPM1K	coding	364.574	-1.74091	0.384002	-4.53359	5.79883e-06	0.00041877
MYH7B	coding	624.415	-1.732	0.341144	-5.07703	3.83385e-07	4.14304e-05
FAM46C	coding	90.4616	-1.72493	0.258389	-6.67569	2.46076e-11	1.05609e-08
LOC105603989	coding	22.7735	-1.71377	0.404413	-4.23767	2.25849e-05	0.00123813
LOC101109633	coding	95.7058	-1.70698	0.36511	-4.67526	2.9358e-06	0.000233912
CST6	coding	44.214	-1.69466	0.370397	-4.57526	4.75628e-06	0.000353684
TMEM236	coding	15.213	-1.69421	0.397901	-4.25787	2.06381e-05	0.00116107
CDH1	coding	18.3247	-1.67872	0.379234	-4.4266	9.5728e-06	0.000626204
MYOG	coding	62.1691	-1.6778	0.382617	-4.38506	1.15956e-05	0.00072273
PLEKHH3	coding	69.9273	-1.6755	0.380199	-4.40691	1.04857e-05	0.000666681
ADAMTS8	coding	7.46888	-1.67533	0.460788	-3.63578	0.000277139	0.0092304
MYL6B	coding	4051.07	-1.67127	0.454231	-3.67933	0.000233845	0.00808421
KCNS3	coding	541.421	-1.66559	0.346272	-4.81008	1.5087e-06	0.000135203
SEMA6C	coding	1338.32	-1.65495	0.274084	-6.03812	1.55918e-09	3.96956e-07
THSD4	coding	32.7011	-1.65028	0.386146	-4.27371	1.92246e-05	0.00110219
PPP1R3B	coding	473.539	-1.64447	0.372353	-4.41641	1.00353e-05	0.000644188
STBD1	coding	1357.97	-1.64302	0.309464	-5.30925	1.10076e-07	1.42539e-05
LOC101107030	coding	6.75664	-1.64153	0.456347	-3.5971	0.00032178	0.01035
CDHR3	coding	10.8373	-1.64078	0.454882	-3.60705	0.000309703	0.0101132
TRIM7	coding	658.309	-1.63615	0.31269	-5.2325	1.67231e-07	2.04226e-05
LOC101106528	coding	41.5315	-1.63552	0.354048	-4.61948	3.84698e-06	0.000291846
PCK1	coding	23.4619	-1.62178	0.458972	-3.53351	0.000410074	0.0122763
LOC101106024	coding	8.1772	-1.6205	0.457223	-3.54423	0.000393757	0.0119487
RXRG	coding	416.311	-1.61862	0.293153	-5.52143	3.36246e-08	5.20696e-06
PCDH12	coding	119.492	-1.61643	0.251506	-6.42702	1.30127e-10	4.65389e-08
PIGZ	coding	48.5777	-1.60967	0.339561	-4.74044	2.13254e-06	0.000179026
FER1L6	coding	16.3517	-1.60442	0.429051	-3.73945	0.00018442	0.00678964
LOC101110855	coding	119.185	-1.60428	0.34159	-4.69651	2.6465e-06	0.000214576
CDC42EP3	coding	158.329	-1.59966	0.26993	-5.92618	3.10055e-09	7.16513e-07
MYL2	coding	27651.2	-1.5993	0.271003	-5.90141	3.60413e-09	7.96142e-07
MYOD1	coding	66.4262	-1.59108	0.398865	-3.98901	6.6351e-05	0.00302936
MMP15	coding	102.54	-1.58652	0.320765	-4.94606	7.57293e-07	7.58353e-05
CARNS1	coding	383.715	-1.58165	0.374531	-4.22302	2.41054e-05	0.00130247
RAI14	coding	180.989	-1.5781	0.335055	-4.70998	2.47737e-06	0.000204464
ASS1	coding	325.191	-1.57468	0.291461	-5.40273	6.56341e-08	9.30085e-06
MLF1	coding	689.751	-1.56842	0.276521	-5.67196	1.41169e-08	2.61791e-06
VNN1	coding	26.9946	-1.56627	0.336336	-4.65686	3.21076e-06	0.000248602
TFRC	coding	1296.67	-1.56536	0.343439	-4.5579	5.16668e-06	0.000380899
PDE8B	coding	37.574	-1.5521	0.337548	-4.59815	4.26265e-06	0.000320146
LOC101107119	coding	142.321	-1.53597	0.304678	-5.04131	4.62362e-07	4.85674e-05
RIMS2	coding	20.7765	-1.52649	0.400706	-3.8095	0.000139246	0.00547544
ITGA7	coding	1457.34	-1.52167	0.238224	-6.38757	1.6854e-10	5.88754e-08
PLXDC1	coding	205.64	-1.51198	0.347868	-4.3464	1.38387e-05	0.000834825
PLEKHA6	coding	19.1388	-1.49394	0.417236	-3.58056	0.000342857	0.0108422
P2RY1	coding	273.785	-1.48867	0.247849	-6.00635	1.89742e-09	4.7502e-07
LOC101107809	coding	17.8645	-1.47967	0.440686	-3.35766	0.000786063	0.0198445
LOC101120797	coding	22.721	-1.4733	0.389344	-3.78405	0.000154298	0.00586769
TOB1	coding	1325.91	-1.47242	0.299401	-4.91789	8.74814e-07	8.58861e-05
EMILIN3	coding	24.5544	-1.47212	0.396949	-3.70858	0.000208427	0.00743655
LOC101107541	coding	1266.73	-1.47008	0.211649	-6.94582	3.76266e-12	2.09329e-09
CD40	coding	12.3496	-1.46668	0.430966	-3.40325	0.000665905	0.0175176
LOC105608996	coding	5.79068	-1.46099	0.460909	-3.1698	0.00152542	0.0324093
XCR1	coding	10.7863	-1.45552	0.434001	-3.35373	0.000797288	0.0200604
SEC14L5	coding	9.17347	-1.44836	0.436094	-3.32121	0.000896283	0.0217146
GPD1	coding	8416.61	-1.43777	0.213901	-6.72167	1.79651e-11	8.17741e-09
TNNT1	coding	14367.1	-1.43739	0.214654	-6.69633	2.13717e-11	9.4419e-09
CCDC80	coding	888.716	-1.43609	0.338703	-4.23996	2.23556e-05	0.00123457
PPARGC1B	coding	396.191	-1.43214	0.334614	-4.27998	1.86908e-05	0.0010773
MB	coding	63929.7	-1.43124	0.290235	-4.93131	8.16819e-07	8.072e-05
CFAP52	coding	36.3242	-1.43122	0.437003	-3.27508	0.00105633	0.0242989
FAM101B	coding	332.046	-1.42366	0.269196	-5.28856	1.2328e-07	1.55613e-05
LOC101113965	coding	137.109	-1.41868	0.277629	-5.10996	3.2222e-07	3.53289e-05
MYLK3	coding	224.49	-1.40608	0.264495	-5.31609	1.06021e-07	1.38482e-05
NUAK2	coding	8.15957	-1.39917	0.450999	-3.10238	0.0019197	0.0381012
HPDL	coding	19.015	-1.39709	0.382978	-3.64797	0.000264319	0.0089021
LOC105606073	coding	11.1348	-1.39197	0.451611	-3.08222	0.00205461	0.0398951
SCD	coding	635.535	-1.39115	0.457732	-3.03923	0.00237185	0.0440935
CCR8	coding	17.7603	-1.38904	0.418293	-3.32075	0.000897768	0.0217156
ADCY1	coding	24.2863	-1.38812	0.399111	-3.47803	0.000505113	0.0143699
ADAMTS16	coding	50.1892	-1.38762	0.39243	-3.53597	0.000406279	0.0122544
ETNPPL	coding	648.068	-1.38643	0.267388	-5.18508	2.15925e-07	2.49541e-05
FAM71A	coding	18.1813	-1.37587	0.46031	-2.98901	0.00279882	0.0491133
METTL6	coding	138.168	-1.3741	0.256022	-5.36711	8.00067e-08	1.10255e-05
XCL1	coding	8.00933	-1.37243	0.437403	-3.13768	0.00170289	0.0353302
MYH7	coding	99848.5	-1.37163	0.182272	-7.52518	5.26485e-14	4.39352e-11
SLC6A6	coding	42.006	-1.36399	0.340228	-4.00903	6.09687e-05	0.00283533
UTS2R	coding	4.45269	-1.36385	0.45465	-2.99978	0.00270178	0.0479918
P2RY2	coding	136.32	-1.35707	0.228698	-5.9339	2.95828e-09	6.94318e-07
MEOX1	coding	33.3425	-1.35561	0.340237	-3.9843	6.76797e-05	0.00307665
RNF122	coding	187.17	-1.35235	0.33418	-4.04678	5.19277e-05	0.00250818
ARX	coding	14.8935	-1.34913	0.395434	-3.41177	0.000645429	0.0171897
GPI	coding	10566.8	-1.33756	0.219886	-6.083	1.17952e-09	3.22139e-07
FZD7	coding	235.153	-1.3365	0.256078	-5.21909	1.79804e-07	2.16067e-05
TLR7	coding	15.042	-1.33157	0.385103	-3.45769	0.000544823	0.0152103
PLN	coding	879.124	-1.32888	0.314082	-4.231	2.32652e-05	0.00126618
MASP1	coding	79.5983	-1.32753	0.294615	-4.50598	6.60677e-06	0.000472573
SLC2A11	coding	16.4318	-1.31379	0.411483	-3.19282	0.00140891	0.0307405
FREM2	coding	46.0646	-1.30881	0.415864	-3.14721	0.00164839	0.0344853
IRAK2	coding	52.4616	-1.30018	0.320708	-4.05408	5.03309e-05	0.00244667
FRMPD1	coding	28.5361	-1.29929	0.392264	-3.31228	0.000925396	0.0220992
TLCD2	coding	21.2943	-1.29087	0.432081	-2.98755	0.00281219	0.0491531
NAPEPLD	coding	132.825	-1.29086	0.363407	-3.5521	0.00038217	0.0116678
AXIN2	coding	16.2471	-1.2904	0.391428	-3.29665	0.000978462	0.0230007
RNF207	coding	21.1085	-1.2872	0.424411	-3.03292	0.00242202	0.0443673
LPL	coding	585.736	-1.28073	0.345709	-3.70465	0.000211682	0.00749922
PDP1	coding	427.119	-1.27777	0.240975	-5.3025	1.14228e-07	1.46652e-05
DLG2	coding	62.5277	-1.27695	0.312096	-4.09154	4.28527e-05	0.00213851
MAFB	coding	403.719	-1.27474	0.353692	-3.6041	0.000313232	0.0101841
IRF1	coding	193.993	-1.26888	0.347112	-3.65552	0.000256663	0.00871403
PC	coding	186.276	-1.26065	0.2996	-4.20779	2.57877e-05	0.00136875
MKRN2OS	coding	70.9367	-1.25555	0.389733	-3.22156	0.00127496	0.0283302
TNNC1	coding	20532.5	-1.25487	0.261368	-4.80114	1.57764e-06	0.000139398
ABAT	coding	39.6399	-1.24531	0.352337	-3.53444	0.000408643	0.0122763
KCNN1	coding	16.8937	-1.23455	0.394487	-3.12951	0.00175099	0.035994
ARHGEF9	coding	48.4617	-1.23385	0.303409	-4.06663	4.76977e-05	0.00232619
LSMEM1	coding	113.238	-1.23365	0.366546	-3.36562	0.000763728	0.0193783
MYOZ2	coding	1519.17	-1.23124	0.336751	-3.65623	0.000255952	0.00871403
SLC12A2	coding	243.835	-1.22889	0.286277	-4.29266	1.76545e-05	0.00102722
LOC106990122	coding	361.819	-1.22606	0.363405	-3.37381	0.000741354	0.0189708
DPF3	coding	168.837	-1.22087	0.22594	-5.40351	6.5349e-08	9.30085e-06
SLC25A13	coding	35.4534	-1.21536	0.328356	-3.70134	0.000214465	0.00757995
FAM78A	coding	726.075	-1.21381	0.326217	-3.72087	0.000198539	0.00717418
RGMA	coding	110.501	-1.21246	0.226426	-5.35479	8.56572e-08	1.16969e-05
TNNI1	coding	873.66	-1.21225	0.251502	-4.82004	1.4353e-06	0.000129878
LOC106991667	coding	17.8093	-1.21156	0.406599	-2.97975	0.00288484	0.0498789
JPH2	coding	945.648	-1.21083	0.340548	-3.55552	0.000377227	0.0115613
BHLHE40	coding	712.632	-1.20841	0.284077	-4.25381	2.1016e-05	0.00117791
PGK1	coding	8014.7	-1.2009	0.247813	-4.846	1.25978e-06	0.000114685
GLRX5	coding	624.597	-1.19703	0.271487	-4.40914	1.03782e-05	0.000663365
ORMDL3	coding	410.026	-1.19582	0.298533	-4.00565	6.18459e-05	0.00286724
PDK3	coding	133.194	-1.19278	0.333743	-3.57394	0.000351646	0.0110504
LOC101102178	coding	183.844	-1.19165	0.332898	-3.57962	0.000344094	0.010855
KLHL33	coding	574.598	-1.19077	0.272163	-4.3752	1.21319e-05	0.00074686
SLC25A25	coding	723.372	-1.1907	0.382943	-3.10935	0.001875	0.0376027
SLC25A29	coding	94.5343	-1.18914	0.306143	-3.88426	0.000102643	0.00428501
EML1	coding	431.518	-1.17705	0.267134	-4.40622	1.05188e-05	0.000666681
PTGES3L	coding	130.93	-1.17671	0.274167	-4.29194	1.77118e-05	0.00102722
LOC101108696	coding	97.1248	-1.17284	0.361381	-3.24543	0.00117273	0.0264101
MYO16	coding	32.5911	-1.17088	0.37425	-3.12859	0.00175645	0.035994
FGFRL1	coding	74.246	-1.16865	0.279738	-4.17766	2.94523e-05	0.00154148
NPNT	coding	88.4117	-1.16327	0.386809	-3.00734	0.00263542	0.0472959
DTX4	coding	29.1771	-1.16302	0.356752	-3.26001	0.00111408	0.0254324
HSPB3	coding	232.73	-1.16233	0.287229	-4.0467	5.1945e-05	0.00250818
FHOD3	coding	171.888	-1.15825	0.261113	-4.43581	9.17264e-06	0.000604308
IER3	coding	163.906	-1.15816	0.288136	-4.01949	5.8325e-05	0.00275503
VEGFA	coding	1105.34	-1.15594	0.318925	-3.62448	0.00028954	0.00958349
TPM3	coding	11876	-1.15365	0.2377	-4.8534	1.21365e-06	0.000113981
CLSTN2	coding	24.6427	-1.15245	0.332385	-3.46721	0.000525892	0.0147833
SLC5A3	coding	108.757	-1.15175	0.37927	-3.03675	0.00239146	0.0443483
AGL	coding	2295.03	-1.15164	0.273864	-4.20515	2.60908e-05	0.00137997
CSRP2	coding	68.5323	-1.15154	0.318032	-3.62083	0.000293661	0.00965226
IPP	coding	87.567	-1.14801	0.242177	-4.74036	2.13339e-06	0.000179026
MYOZ3	coding	3530.14	-1.14487	0.325373	-3.51862	0.000433797	0.0128269
REEP1	coding	354.136	-1.14173	0.229413	-4.97676	6.46571e-07	6.6069e-05
PROX1	coding	106.255	-1.14108	0.380923	-2.99556	0.00273941	0.0483533
PTGDR	coding	21.6837	-1.13918	0.369796	-3.08057	0.00206603	0.0399406
GPT	coding	314.01	-1.13657	0.229182	-4.95926	7.07625e-07	7.18191e-05
TRIM13	coding	83.6423	-1.13383	0.333287	-3.40196	0.00066905	0.0175696
GSTT2B	coding	35.2797	-1.12352	0.329931	-3.40532	0.000660864	0.0174768
LOC105606870	coding	20.2825	-1.12223	0.373972	-3.00085	0.00269228	0.0479155
IGDCC4	coding	317.512	-1.11742	0.373402	-2.99254	0.00276667	0.0487772
MAF	coding	115.721	-1.11611	0.341401	-3.26921	0.00107848	0.0247661
PPP1R16B	coding	66.3926	-1.11211	0.31356	-3.54674	0.00039003	0.0118596
NUDT3	coding	781.236	-1.10931	0.236154	-4.69741	2.6348e-06	0.000214576
GPT2	coding	1857.76	-1.10751	0.22159	-4.99803	5.79191e-07	6.04168e-05
PITX1	coding	162.02	-1.10529	0.307482	-3.59466	0.000324819	0.0104032
CASQ2	coding	313.969	-1.10199	0.264163	-4.17161	3.0245e-05	0.00157746
CAMK2A	coding	1900.2	-1.09713	0.293574	-3.73715	0.00018612	0.00681881
MARCKSL1	coding	32.2882	-1.09712	0.35025	-3.1324	0.00173386	0.0358244
GDAP1	coding	125.614	-1.09164	0.318138	-3.43133	0.000600627	0.0163147
AHCYL2	coding	980.134	-1.09009	0.201264	-5.41623	6.08703e-08	8.80349e-06
KCNC4	coding	222.348	-1.08869	0.318255	-3.42082	0.000624326	0.0167764
SREBF1	coding	319.868	-1.08351	0.32406	-3.34355	0.000827136	0.0204686
CNTNAP1	coding	51.0001	-1.08302	0.269322	-4.02128	5.78825e-05	0.00274275
ZNF827	coding	38.854	-1.07799	0.306152	-3.52108	0.000429791	0.0127335
ZNF367	coding	55.0869	-1.07663	0.301293	-3.57337	0.000352418	0.0110515
LIN52	coding	99.3105	-1.07065	0.299136	-3.57916	0.000344705	0.010855
LGALS1	coding	1586.18	-1.06489	0.246692	-4.31669	1.58388e-05	0.000932998
GRIP2	coding	236.974	-1.06454	0.34585	-3.07804	0.00208367	0.0401266
ABHD6	coding	20.7615	-1.06096	0.348307	-3.04604	0.00231873	0.0433734
B3GLCT	coding	93.442	-1.05682	0.236951	-4.4601	8.19211e-06	0.000554296
KIAA1161	coding	534.851	-1.05333	0.317281	-3.31987	0.000900595	0.0217489
CD93	coding	235.215	-1.053	0.205003	-5.13649	2.79922e-07	3.13784e-05
CDC42EP2	coding	106.455	-1.05263	0.305665	-3.44372	0.000573772	0.015785
SERPINH1	coding	1073.77	-1.04746	0.301629	-3.47268	0.000515293	0.0145493
AZIN1	coding	315.927	-1.04744	0.261668	-4.00296	6.25555e-05	0.00289122
LDHB	coding	701.259	-1.0426	0.216901	-4.80679	1.53375e-06	0.000136322
S100A1	coding	209.324	-1.04113	0.320109	-3.25241	0.00114433	0.0259652
ASB15	coding	304.678	-1.04063	0.171768	-6.05832	1.37547e-09	3.6446e-07
CD320	coding	97.8359	-1.0389	0.290937	-3.57087	0.0003558	0.0111112
SCARB1	coding	172.095	-1.03881	0.23257	-4.46666	7.94485e-06	0.000539998
RAB3A	coding	61.7359	-1.03618	0.312655	-3.31415	0.000919221	0.0219867
LIMCH1	coding	1753.34	-1.03469	0.199641	-5.18274	2.18647e-07	2.49541e-05
ALAS1	coding	1172.27	-1.03361	0.156796	-6.59206	4.33751e-11	1.67061e-08
HSD17B12	coding	105.918	-1.03361	0.327462	-3.15642	0.0015972	0.0335546
DHRS7B	coding	148.476	-1.03303	0.287686	-3.59083	0.000329625	0.0105123
PIK3R3	coding	23.9558	-1.02625	0.339962	-3.01873	0.00253834	0.0459644
TMEM52	coding	352.709	-1.02515	0.328557	-3.12015	0.00180758	0.0367411
NTN4	coding	57.4836	-1.01651	0.320315	-3.17346	0.00150632	0.0322313
LOC101108463	coding	30.1632	-1.01419	0.332436	-3.05077	0.00228252	0.0429645
CDNF	coding	80.2142	-1.01372	0.239036	-4.24089	2.22633e-05	0.00123401
CLCN4	coding	403.216	-1.01332	0.276026	-3.67111	0.000241502	0.00828221
DHDH	coding	396.767	-1.00814	0.237881	-4.23801	2.25513e-05	0.00123813
IRS1	coding	578.747	-1.00735	0.229055	-4.39786	1.09324e-05	0.000689982
GAMT	coding	739.408	-1.00693	0.196424	-5.12629	2.95507e-07	3.28801e-05
PPM1J	coding	159.991	-1.00392	0.299335	-3.35383	0.000797007	0.0200604
RAVER2	coding	250.73	-0.997883	0.282416	-3.53339	0.000410272	0.0122763
KCNJ12	coding	524.605	-0.995903	0.328336	-3.03318	0.0024199	0.0443673
CCDC88C	coding	1847.66	-0.995717	0.254835	-3.9073	9.33334e-05	0.00401709
PGP	coding	1101.24	-0.994203	0.265164	-3.74939	0.000177262	0.00659072
MAP3K7CL	coding	32.977	-0.992575	0.296814	-3.3441	0.000825512	0.0204686
SEMA4D	coding	971.008	-0.990886	0.263285	-3.76355	0.000167516	0.0063064
ITGB1BP2	coding	485.251	-0.989308	0.322117	-3.07127	0.00213152	0.0407897
TP53I11	coding	57.3473	-0.9864	0.299895	-3.28915	0.00100492	0.0234758
FGF1	coding	100.546	-0.986134	0.256261	-3.84816	0.000119008	0.00477974
AHDC1	coding	302.736	-0.975346	0.279962	-3.48386	0.000494246	0.0141952
ARHGAP23	coding	144.684	-0.968539	0.282959	-3.42289	0.000619582	0.0167087
LOC101117028	coding	209.923	-0.96814	0.275961	-3.50825	0.000451065	0.0132333
BCL9L	coding	186.874	-0.965802	0.264848	-3.64662	0.000265711	0.00892895
NDUFA1	coding	49.0863	-0.965354	0.295787	-3.26368	0.00109977	0.0251823
KCNIP2	coding	156.65	-0.964369	0.27629	-3.49042	0.000482267	0.0140119
PCDH1	coding	157.006	-0.96212	0.281005	-3.42386	0.000617389	0.0166795
AMPD1	coding	4064.87	-0.962085	0.276522	-3.47924	0.000502843	0.0143324
CHRNE	coding	318.882	-0.956573	0.304523	-3.14122	0.00168246	0.035003
NMNAT3	coding	116.895	-0.95492	0.309909	-3.0813	0.00206102	0.0398951
GALNT12	coding	56.0694	-0.954247	0.275247	-3.46688	0.000526533	0.0147833
CA14	coding	1007.62	-0.95158	0.261462	-3.63946	0.000273213	0.00911987
ENOX2	coding	92.7113	-0.950508	0.23495	-4.04558	5.21936e-05	0.00250818
SLC37A4	coding	288.473	-0.943207	0.277987	-3.39299	0.000691339	0.0179976
XPO4	coding	302.831	-0.94278	0.266222	-3.54133	0.000398119	0.0120325
DMPK	coding	157.75	-0.941689	0.253096	-3.72068	0.000198686	0.00717418
PFKFB2	coding	232.804	-0.94159	0.275491	-3.41787	0.000631138	0.0169291
LAMA3	coding	57.5282	-0.941053	0.307234	-3.06298	0.00219145	0.0415628
SLC27A1	coding	122.435	-0.94042	0.262164	-3.58715	0.00033431	0.0106391
LOC101102638	coding	150.035	-0.939012	0.251798	-3.72923	0.000192067	0.00698557
KLHL31	coding	1059.27	-0.937513	0.279747	-3.35129	0.000804352	0.020137
YIPF7	coding	261.047	-0.931647	0.267017	-3.48909	0.000484666	0.0140544
CAMK2G	coding	821.509	-0.924538	0.233797	-3.95445	7.67097e-05	0.00337905
RCAN2	coding	50.2232	-0.923023	0.295104	-3.12779	0.00176125	0.0360433
ME2	coding	97.0419	-0.91687	0.278192	-3.29581	0.000981375	0.0230323
SLC2A12	coding	91.2769	-0.904619	0.266419	-3.39547	0.000685103	0.0178973
ALDH2	coding	6985.68	-0.903529	0.209699	-4.30869	1.64223e-05	0.000959843
KCNJ2	coding	159.044	-0.903397	0.297713	-3.03445	0.00240973	0.0443673
CASQ1	coding	20659	-0.902027	0.298863	-3.01819	0.00254287	0.0459644
NDUFAF1	coding	185.854	-0.900225	0.225622	-3.98997	6.60828e-05	0.00302631
NUP43	coding	80.0764	-0.893168	0.282106	-3.16607	0.00154511	0.0326429
FEM1C	coding	167.054	-0.890921	0.292984	-3.04085	0.0023591	0.0439654
BMPR1A	coding	200.656	-0.884759	0.234994	-3.76502	0.000166534	0.00628519
ATP2A2	coding	11829.8	-0.88313	0.227359	-3.8843	0.000102626	0.00428501
LOC101110145	coding	31788.3	-0.881495	0.285123	-3.09163	0.00199062	0.0390865
LRRC39	coding	719.533	-0.881128	0.168679	-5.22369	1.75392e-07	2.12464e-05
ANK2	coding	988.433	-0.880562	0.210753	-4.17817	2.93859e-05	0.00154148
TPI1	coding	7981.82	-0.880205	0.229686	-3.83221	0.000126998	0.00504665
LOC101109746	coding	83.7676	-0.878628	0.2756	-3.18805	0.00143236	0.0311367
AMOTL1	coding	1803.31	-0.87688	0.226969	-3.86344	0.000111802	0.00453788
C20H6orf136	coding	166.482	-0.876272	0.236164	-3.71045	0.000206895	0.00739945
ADHFE1	coding	242.687	-0.873258	0.251513	-3.47202	0.000516567	0.0145579
NT5C1A	coding	931.072	-0.873149	0.229694	-3.80136	0.000143906	0.0056439
ABCC5	coding	418.304	-0.867561	0.23164	-3.7453	0.000180178	0.00666613
TCAIM	coding	71.0213	-0.867324	0.271861	-3.19032	0.00142114	0.0309375
THRB	coding	133.383	-0.862294	0.241367	-3.57255	0.000353524	0.0110631
SDHC	coding	1579.45	-0.861464	0.172832	-4.98439	6.2158e-07	6.39504e-05
NDUFS1	coding	2162.6	-0.861223	0.162897	-5.2869	1.24406e-07	1.55725e-05
ORAI1	coding	264.067	-0.857976	0.287149	-2.98791	0.00280896	0.0491531
IDH3A	coding	1535.6	-0.856571	0.193885	-4.41794	9.96476e-06	0.000644188
NFIX	coding	2056.42	-0.854556	0.231998	-3.68346	0.000230089	0.00803759
LOC101108105	coding	63.3878	-0.845482	0.272223	-3.10584	0.00189742	0.0378313
CRY2	coding	203.937	-0.843082	0.245679	-3.43164	0.000599939	0.0163147
PRUNE	coding	144.577	-0.842591	0.232512	-3.62387	0.000290229	0.00958349
PGFS	coding	411.137	-0.840766	0.258923	-3.24717	0.00116559	0.0263679
ASB12	coding	651.665	-0.840352	0.257081	-3.26883	0.00107994	0.0247661
GCAT	coding	245.769	-0.83449	0.206288	-4.04526	5.22642e-05	0.00250818
SLC25A30	coding	265.981	-0.832914	0.220971	-3.76934	0.000163682	0.00619311
DYRK1B	coding	659.493	-0.824983	0.231749	-3.55981	0.000371117	0.0114703
SMYD1	coding	2583.38	-0.819315	0.263484	-3.10954	0.00187377	0.0376027
LOC101120590	coding	274.617	-0.819126	0.227322	-3.60337	0.00031412	0.0101909
MVB12B	coding	165.639	-0.814687	0.218352	-3.73108	0.000190662	0.00695128
IVD	coding	760.204	-0.813395	0.167733	-4.84936	1.23863e-06	0.000114685
ASB16	coding	747.486	-0.810342	0.254625	-3.1825	0.00146011	0.031544
RNF149	coding	108.618	-0.806609	0.232159	-3.47438	0.00051203	0.0145117
SLC2A4	coding	952.455	-0.806312	0.226086	-3.56639	0.000361934	0.0112559
ALDH5A1	coding	825.943	-0.805904	0.243983	-3.30311	0.000956184	0.0226543
GPRC5C	coding	431.291	-0.803941	0.255398	-3.1478	0.00164502	0.0344628
SLCO2B1	coding	212.929	-0.802396	0.237441	-3.37935	0.000726572	0.0186277
LOC101109747	coding	683.855	-0.802019	0.237807	-3.37256	0.00074472	0.0190245
SMAD3	coding	427.955	-0.801755	0.21464	-3.73534	0.000187458	0.00685113
MTHFR	coding	310.988	0.809239	0.271587	2.97967	0.00288561	0.0498789
CA4	coding	106.509	0.815343	0.255847	3.18684	0.00143839	0.0311775
OSBPL11	coding	169.906	0.815397	0.223743	3.64434	0.000268077	0.00896835
CSNK1D	coding	1344.69	0.817185	0.259743	3.14612	0.00165451	0.0345651
LAMA2	coding	891.412	0.821615	0.258995	3.17232	0.00151225	0.0323122
CCND3	coding	83.4903	0.827138	0.25821	3.20335	0.00135841	0.0298313
OGFR	coding	66.538	0.82907	0.252199	3.28736	0.00101131	0.0235345
SLC25A42	coding	58.6605	0.829905	0.275345	3.01405	0.00257783	0.0464288
HADHB	coding	2497.45	0.830975	0.271092	3.06529	0.0021746	0.0413477
SEPP1	coding	1125.68	0.831257	0.270306	3.07524	0.00210332	0.0403619
FTSJ3	coding	119.182	0.832601	0.272583	3.05448	0.00225448	0.0425434
SFMBT1	coding	103.311	0.836168	0.24028	3.47998	0.000501457	0.0143201
UBXN7	coding	62.6662	0.836762	0.272592	3.06965	0.00214313	0.0409046
FTH1	coding	17927	0.838152	0.138367	6.05744	1.38301e-09	3.6446e-07
DGKD	coding	255.656	0.838356	0.270683	3.09718	0.0019537	0.0385631
KLHL34	coding	252.31	0.839353	0.258819	3.24301	0.00118275	0.0265165
ECE1	coding	1090.99	0.839575	0.197792	4.24474	2.18847e-05	0.00121752
LMOD2	coding	5712.88	0.8423	0.242395	3.4749	0.000511038	0.014511
CAPN7	coding	150.634	0.842464	0.227035	3.71072	0.000206669	0.00739945
C3H12orf10	coding	146.742	0.842472	0.27769	3.03385	0.00241453	0.0443673
PLCD3	coding	163.032	0.846374	0.247041	3.42605	0.000612428	0.0166052
NOL6	coding	132.514	0.84999	0.230895	3.68129	0.000232057	0.00806882
APIP	coding	192.742	0.851351	0.282834	3.01007	0.00261186	0.0469853
CD276	coding	73.5927	0.853761	0.237337	3.59725	0.000321603	0.01035
PRKCQ	coding	712.111	0.858033	0.22608	3.79527	0.000147482	0.00575411
LIN54	coding	96.1472	0.858611	0.258784	3.31787	0.000907076	0.0218003
POLR2D	coding	166.481	0.862335	0.217972	3.95618	7.61578e-05	0.00337357
MCM9	coding	71.275	0.862377	0.282793	3.0495	0.00229224	0.0430396
SPECC1	coding	334.786	0.864206	0.222754	3.87965	0.000104607	0.00434061
SLC43A1	coding	104.38	0.864882	0.288532	2.99753	0.00272181	0.0481655
PABPC1	coding	582.521	0.865171	0.22454	3.85308	0.000116639	0.00469714
ALS2CL	coding	255.969	0.866059	0.226108	3.83028	0.000127997	0.00507294
RUVBL1	coding	526.297	0.86796	0.234082	3.70794	0.000208955	0.00743771
KAT2A	coding	180.901	0.869327	0.277429	3.13352	0.00172724	0.0357368
HFE	coding	53.9563	0.875401	0.284073	3.0816	0.00205888	0.0398951
BACH1	coding	176.306	0.881368	0.29187	3.01973	0.00253004	0.0459537
HNRNPA1	coding	193.494	0.886325	0.215987	4.10361	4.06749e-05	0.00205026
STK10	coding	320.425	0.887458	0.226277	3.922	8.78185e-05	0.0038015
SLC39A5	coding	81.1383	0.890056	0.245209	3.62979	0.000283651	0.00942637
PNPLA2	coding	889.491	0.892321	0.259254	3.44188	0.000577694	0.0158639
PRMT3	coding	64.3131	0.894373	0.284874	3.13954	0.00169211	0.0351552
CAST	coding	617.755	0.894437	0.205406	4.35449	1.3338e-05	0.000814431
CALCOCO2	coding	1104.38	0.894694	0.226124	3.95665	7.60077e-05	0.00337357
TRMT1	coding	156.073	0.898342	0.245337	3.66166	0.000250584	0.00855461
CRYL1	coding	74.433	0.901908	0.258778	3.48526	0.000491662	0.0141751
RRAS2	coding	58.592	0.90319	0.289756	3.11707	0.00182657	0.0369273
LOC101122777	coding	20948.9	0.903438	0.196479	4.59815	4.26265e-06	0.000320146
POLR3D	coding	227.305	0.906014	0.274352	3.30238	0.000958697	0.0226781
SLC15A4	coding	227.277	0.908772	0.282712	3.21448	0.00130682	0.0289098
CNRIP1	coding	88.9499	0.910095	0.304423	2.98958	0.00279361	0.0491133
USP25	coding	1270.48	0.912608	0.175693	5.19434	2.05446e-07	2.44922e-05
NRAP	coding	34863.4	0.913858	0.245369	3.72442	0.000195765	0.00710285
FURIN	coding	264.409	0.920046	0.298877	3.07834	0.00208156	0.0401266
QSOX2	coding	114.435	0.924771	0.277794	3.32898	0.000871654	0.0213243
UBE2Q1	coding	477.095	0.924875	0.237115	3.90054	9.59801e-05	0.00408418
ST3GAL2	coding	599.988	0.925381	0.263603	3.51051	0.00044724	0.0131725
TBC1D17	coding	496.094	0.930477	0.252668	3.6826	0.000230865	0.008046
CCDC86	coding	189.218	0.935355	0.294568	3.17535	0.00149658	0.0321603
NOP2	coding	380.313	0.939417	0.265251	3.54161	0.000397688	0.0120325
SSH2	coding	1365.23	0.940993	0.269483	3.49184	0.00047971	0.0139917
DHRS7	coding	51.5688	0.943316	0.303096	3.11226	0.00185659	0.0374333
NOP14	coding	207.778	0.951075	0.288119	3.30098	0.000963463	0.022755
FAM222B	coding	377.846	0.952303	0.285759	3.33254	0.000860568	0.0211219
MLYCD	coding	226.177	0.954486	0.237529	4.01839	5.85966e-05	0.00275919
GATSL2	coding	1854.83	0.956559	0.214836	4.45251	8.48709e-06	0.000569128
NSMAF	coding	456.348	0.958003	0.216882	4.41715	1.00009e-05	0.000644188
MFSD12	coding	66.9969	0.960048	0.302236	3.17648	0.00149073	0.0320806
CCDC137	coding	66.7712	0.960102	0.29501	3.25447	0.00113603	0.0258159
DAPK2	coding	346.344	0.960293	0.265139	3.62184	0.000292512	0.00963558
GPATCH4	coding	63.6182	0.961488	0.298602	3.21997	0.00128203	0.0284452
ADAMTS10	coding	36.5974	0.962869	0.299706	3.21271	0.00131487	0.0290451
NMT2	coding	61.2514	0.965305	0.293999	3.28336	0.00102576	0.0237728
CTSH	coding	126.999	0.966806	0.199443	4.84753	1.25005e-06	0.000114685
MTMR14	coding	247.747	0.970402	0.285365	3.40057	0.000672467	0.0176285
LOC101105809	coding	533.573	0.973441	0.223602	4.35345	1.34013e-05	0.000814981
TP53INP1	coding	45.7476	0.974442	0.288012	3.38334	0.000716102	0.0184504
MYLIP	coding	166.108	0.977325	0.326963	2.9891	0.00279797	0.0491133
SCUBE2	coding	145.111	0.977529	0.260371	3.75437	0.000173778	0.00652579
MEDAG	coding	325.666	0.978035	0.30853	3.16999	0.00152447	0.0324093
EBNA1BP2	coding	73.4297	0.980259	0.295137	3.32137	0.000895766	0.0217146
SEPSECS	coding	45.4642	0.983824	0.297198	3.31034	0.00093184	0.0221474
F2RL2	coding	37.2892	0.98595	0.307676	3.2045	0.00135296	0.0297552
KTN1	coding	606.21	0.98691	0.174555	5.65387	1.56871e-08	2.87361e-06
LOC101105484	coding	8333.12	0.989088	0.168877	5.85687	4.71676e-09	9.97894e-07
TIMP4	coding	252.564	0.990208	0.222557	4.44924	8.6174e-06	0.000572752
GRAMD1B	coding	50.3948	0.990579	0.275462	3.59607	0.000323062	0.010369
TWF2	coding	1742.8	0.991327	0.330761	2.99711	0.00272556	0.0481655
USP49	coding	40.7386	0.991845	0.284972	3.4805	0.000500473	0.0143192
RORA	coding	101.76	0.992888	0.31078	3.19482	0.00139916	0.0305921
METTL3	coding	176.904	0.996773	0.26576	3.75066	0.000176373	0.0065903
CDH15	coding	94.0758	1.00008	0.248033	4.03206	5.52903e-05	0.00263656
FABP5	coding	399.067	1.00203	0.301993	3.31807	0.00090643	0.0218003
CCDC62	coding	29.1135	1.00222	0.323905	3.09419	0.00197354	0.0388018
ACAD11	coding	97.6838	1.00945	0.303139	3.33	0.000868454	0.0212807
ALAD	coding	565.868	1.0102	0.158285	6.38215	1.74623e-10	5.96139e-08
DNTTIP1	coding	1012.12	1.01043	0.311404	3.24477	0.00117546	0.026432
PPL	coding	192.546	1.01297	0.303246	3.34042	0.000836526	0.0205991
EIF4EBP1	coding	642.888	1.01647	0.268313	3.78836	0.000151644	0.00579604
GMPR	coding	3323.45	1.02054	0.235831	4.32741	1.50875e-05	0.000899323
ACTR3B	coding	710.684	1.02437	0.251046	4.08041	4.49573e-05	0.00219968
C1H21orf59	coding	136.881	1.02543	0.247789	4.1383	3.49889e-05	0.00178159
RNF146	coding	301.504	1.03048	0.244897	4.20781	2.57859e-05	0.00136875
MAP1LC3B	coding	315.223	1.03098	0.280582	3.67443	0.000238378	0.00819377
AEN	coding	74.044	1.03213	0.346291	2.98053	0.00287751	0.0498536
ANO6	coding	764.68	1.03581	0.25365	4.08361	4.4341e-05	0.00217737
HIPK2	coding	385.2	1.036	0.279492	3.70671	0.000209967	0.00745605
STAT5B	coding	1562.15	1.03749	0.319644	3.24577	0.00117133	0.0264101
MYF6	coding	1730.16	1.0392	0.231169	4.49542	6.94327e-06	0.000486482
GADD45A	coding	222.73	1.04132	0.330031	3.15521	0.00160382	0.0336466
TRIM54	coding	2410.33	1.04726	0.266903	3.92374	8.7185e-05	0.00378499
GBGT1	coding	61.2621	1.04777	0.276053	3.79555	0.000147319	0.00575411
LOC101115808	coding	87.0105	1.05014	0.280381	3.74541	0.000180103	0.00666613
MCOLN1	coding	260.438	1.05223	0.220117	4.78033	1.75012e-06	0.00015284
S100A13	coding	160.048	1.05357	0.225374	4.67475	2.94317e-06	0.000233912
DDX27	coding	203.05	1.05831	0.222496	4.75655	1.96933e-06	0.000168075
HSPBAP1	coding	59.7117	1.05974	0.347643	3.04834	0.00230106	0.0431499
KIAA0753	coding	26.7714	1.0712	0.330043	3.24565	0.00117184	0.0264101
AATF	coding	76.1965	1.07636	0.251507	4.27965	1.87188e-05	0.0010773
RNF115	coding	180.13	1.07639	0.311979	3.4502	0.000560177	0.0155248
PSME4	coding	1143.45	1.07661	0.292838	3.67648	0.000236474	0.00814697
SMTNL1	coding	487.827	1.07669	0.276371	3.8958	9.78769e-05	0.00414137
APBB2	coding	939.726	1.07814	0.212288	5.07866	3.80115e-07	4.13747e-05
EDEM1	coding	301.722	1.08062	0.259126	4.17024	3.04278e-05	0.00158151
KLF11	coding	443.928	1.08152	0.32698	3.30761	0.000940952	0.0223287
SOCS2	coding	59.3133	1.09139	0.279321	3.9073	9.33337e-05	0.00401709
TMEM201	coding	107.38	1.09432	0.344038	3.18081	0.00146862	0.0316502
RBKS	coding	19.9363	1.09579	0.366272	2.99176	0.00277378	0.0488452
IKBKG	coding	337.126	1.09865	0.297173	3.69701	0.000218153	0.0076922
BTNL9	coding	229.392	1.10076	0.26956	4.08353	4.43562e-05	0.00217737
NOB1	coding	461.625	1.10255	0.325851	3.3836	0.000715411	0.0184504
EIF4G3	coding	1649.37	1.10532	0.212927	5.19109	2.09067e-07	2.47276e-05
HSDL2	coding	612.406	1.1055	0.291535	3.792	0.000149441	0.00578498
IGF1R	coding	338.972	1.10692	0.213535	5.18379	2.17425e-07	2.49541e-05
BNIP3	coding	3793.5	1.10829	0.260872	4.24843	2.15278e-05	0.00120212
AOX1	coding	385.52	1.11324	0.204987	5.43081	5.60983e-08	8.30929e-06
SORT1	coding	392.544	1.11464	0.285554	3.90344	9.4836e-05	0.00405712
OLFM1	coding	35.6575	1.11499	0.362078	3.07942	0.00207407	0.0400445
LOC101122274	coding	33.5914	1.11929	0.327676	3.41584	0.00063585	0.0169647
MYBPHL	coding	624.801	1.12136	0.295914	3.78948	0.000150963	0.00579407
ZFAND5	coding	2522.41	1.12527	0.300771	3.74129	0.000183075	0.00675667
SLC3A2	coding	738.86	1.12689	0.37378	3.01484	0.00257112	0.0463675
SETD7	coding	3038.42	1.12736	0.272648	4.13484	3.55196e-05	0.0018025
COLGALT2	coding	78.4866	1.13024	0.259935	4.34819	1.37268e-05	0.00083141
UGP2	coding	2259.22	1.13318	0.193152	5.8668	4.44275e-09	9.53351e-07
LRCH4	coding	255.411	1.14146	0.269706	4.23224	2.31377e-05	0.00126382
RNF145	coding	271.612	1.14681	0.296343	3.86988	0.00010889	0.00448121
LOC105605579	coding	25.765	1.15066	0.375437	3.06486	0.00217773	0.0413548
CPT1A	coding	131.002	1.15104	0.256215	4.49246	7.0404e-06	0.000486482
FAM20A	coding	38.14	1.15393	0.324211	3.55921	0.000371972	0.0114731
DUSP15	coding	531.958	1.15429	0.278041	4.1515	3.303e-05	0.00169332
WDR91	coding	155.721	1.15556	0.339392	3.40479	0.000662158	0.0174803
ECE2	coding	57.2544	1.17553	0.314476	3.73806	0.000185445	0.00681067
KLHL40	coding	2204.3	1.17573	0.311334	3.77643	0.000159092	0.00603466
MAP1LC3A	coding	734.814	1.17775	0.212304	5.54747	2.8983e-08	4.73211e-06
GPX3	coding	1815.28	1.17825	0.158797	7.41987	1.17234e-13	8.80489e-11
MAP3K14	coding	346.117	1.18516	0.258011	4.59344	4.36007e-06	0.000325834
GPD2	coding	698.9	1.18674	0.268366	4.4221	9.77477e-06	0.000635614
B3GALNT1	coding	413.313	1.18709	0.254575	4.66304	3.11577e-06	0.000243761
PES1	coding	305.325	1.19157	0.25641	4.64714	3.36576e-06	0.000259267
N4BP2	coding	77.2754	1.19498	0.342566	3.48834	0.000486036	0.0140612
DDIT4L	coding	3181.47	1.19565	0.258099	4.63253	3.61226e-06	0.00027543
REV3L	coding	460.063	1.20412	0.267588	4.49989	6.79886e-06	0.000481124
RELL1	coding	123.231	1.20781	0.253368	4.76701	1.8698e-06	0.000162349
MIF4GD	coding	459.184	1.22269	0.214088	5.71117	1.12205e-08	2.13346e-06
FLNC	coding	66210.4	1.22887	0.33911	3.62381	0.000290293	0.00958349
IL6R	coding	702.872	1.2312	0.28864	4.26554	1.99419e-05	0.00113465
THOP1	coding	719.202	1.2378	0.254534	4.86299	1.15627e-06	0.000110987
ECHDC3	coding	1145.07	1.23847	0.368762	3.35845	0.000783804	0.0198207
MOB3B	coding	33.0009	1.23917	0.315038	3.93339	8.37559e-05	0.00366792
TACC2	coding	3905.69	1.2402	0.228407	5.42978	5.64242e-08	8.30929e-06
UNKL	coding	33.0871	1.24034	0.320119	3.87462	0.000106792	0.00440692
RPP38	coding	65.3342	1.24206	0.394967	3.14472	0.00166245	0.0346348
DDO	coding	500.837	1.24771	0.378622	3.29538	0.00098287	0.0230323
ADIPOR2	coding	1208.2	1.2532	0.294125	4.26076	2.03731e-05	0.00115481
KLF9	coding	897.593	1.25827	0.301171	4.17792	2.94187e-05	0.00154148
IPO4	coding	237.731	1.26103	0.224706	5.61194	2.00073e-08	3.49454e-06
LRP4	coding	575.127	1.26634	0.225647	5.61203	1.99972e-08	3.49454e-06
TGFBR3	coding	270.858	1.26682	0.282026	4.49186	7.06033e-06	0.000486482
IRX3	coding	16.4557	1.27587	0.42784	2.98211	0.00286269	0.0498449
LRRC2	coding	1457.84	1.28688	0.262682	4.89899	9.63281e-07	9.33513e-05
RGCC	coding	263.18	1.2988	0.267712	4.85149	1.2254e-06	0.000114327
MRLN	coding	105.51	1.30397	0.313446	4.16009	3.18119e-05	0.00163646
DOK4	coding	103.854	1.30734	0.386196	3.38518	0.000711327	0.0184007
ARL8B	coding	226.21	1.30856	0.338433	3.86652	0.000110399	0.00451456
PGBD5	coding	11.0705	1.31595	0.424429	3.10052	0.00193182	0.0382317
FAM107A	coding	72.4962	1.31982	0.29679	4.44698	8.70847e-06	0.000576255
LOC101117299	coding	247.271	1.32172	0.291272	4.53774	5.68599e-06	0.000412605
PAPSS2	coding	15.4345	1.33535	0.426813	3.12865	0.00175609	0.035994
NT5C3B	coding	36.1152	1.3371	0.353351	3.78405	0.0001543	0.00586769
FGB	coding	5.1035	1.3413	0.448931	2.98776	0.00281032	0.0491531
LOC101117060	coding	34.4978	1.34465	0.429734	3.12904	0.0017538	0.035994
LPIN1	coding	1395.49	1.34557	0.309946	4.3413	1.41642e-05	0.00085104
SLC29A2	coding	243.923	1.34558	0.20345	6.61381	3.74555e-11	1.48058e-08
MANEAL	coding	39.6753	1.36493	0.388134	3.51665	0.000437027	0.012897
TFAP4	coding	23.2986	1.37054	0.408794	3.35265	0.000800416	0.0201054
ARMC2	coding	36.8854	1.37215	0.452338	3.03346	0.00241767	0.0443673
CHI3L1	coding	179.788	1.37429	0.246821	5.56794	2.57764e-08	4.30208e-06
XKR6	coding	4.57189	1.37746	0.459595	2.99711	0.00272554	0.0481655
PIK3R1	coding	831.317	1.37937	0.256007	5.38802	7.1238e-08	1.00006e-05
LOC105605995	coding	8.63921	1.37974	0.45636	3.02336	0.00249987	0.0456198
LOC101117184	coding	19.5608	1.38452	0.460547	3.00625	0.00264492	0.0473533
FNTB	coding	364.437	1.39365	0.253646	5.49447	3.91882e-08	6.00659e-06
ART3	coding	612.155	1.39459	0.307201	4.53966	5.63438e-06	0.000410845
ZBTB16	coding	646.028	1.39762	0.287908	4.8544	1.20755e-06	0.000113981
PDLIM3	coding	38672.5	1.4001	0.263057	5.32242	1.02395e-07	1.36113e-05
HMOX2	coding	598.349	1.40179	0.361408	3.87871	0.000105014	0.00434549
SLC7A6	coding	72.8105	1.4041	0.408417	3.43791	0.000586233	0.0160106
FOXS1	coding	185.844	1.41132	0.353586	3.99145	6.56717e-05	0.00301668
CNTFR	coding	120.792	1.41596	0.326945	4.33087	1.48524e-05	0.000888836
GDNF	coding	18.5103	1.4276	0.408332	3.49619	0.000471961	0.0137925
CDH4	coding	89.5071	1.42805	0.353956	4.03456	5.47056e-05	0.00261698
ENAM	coding	12.1209	1.45446	0.442093	3.28995	0.00100205	0.0234451
UBXN10	coding	9.71739	1.45698	0.426495	3.41617	0.000635074	0.0169647
CDCA7	coding	42.3721	1.45903	0.388898	3.7517	0.000175637	0.00657917
TNS3	coding	442.079	1.46645	0.333805	4.39314	1.11728e-05	0.000699275
PRTG	coding	7.9434	1.46791	0.455995	3.21913	0.00128579	0.0284865
CHD7	coding	247.006	1.47356	0.30928	4.76447	1.89347e-06	0.000163458
LOC105610521	coding	464.934	1.48701	0.378859	3.92497	8.67397e-05	0.00377657
LOC106991400	coding	12.3775	1.48705	0.410988	3.61822	0.000296631	0.0097286
SLC25A33	coding	255.96	1.49701	0.453697	3.29958	0.000968284	0.0228311
LOC101110657	coding	23.578	1.49745	0.387332	3.86607	0.000110602	0.00451456
ADTRP	coding	7.82926	1.5172	0.452661	3.35173	0.000803097	0.020137
WBP1L	coding	395.473	1.52728	0.252268	6.0542	1.41117e-09	3.65469e-07
LIPG	coding	150.647	1.52771	0.311632	4.90229	9.47244e-07	9.23932e-05
BTG1	coding	1067.91	1.53462	0.328409	4.6729	2.96977e-06	0.000234784
PITX3	coding	121.543	1.5385	0.460498	3.34094	0.000834951	0.0205941
CHAD	coding	107.372	1.55165	0.35983	4.31216	1.61669e-05	0.000948603
LOC105602659	coding	4.30591	1.55911	0.459346	3.39418	0.000688335	0.0179505
ACACB	coding	1994.66	1.5615	0.248084	6.29421	3.08961e-10	1.00889e-07
FMO2	coding	13.522	1.56448	0.403117	3.88095	0.00010405	0.00432945
ACTC1	coding	2952.92	1.56899	0.460595	3.40643	0.000658186	0.0174367
SMPDL3A	coding	47.511	1.57315	0.337564	4.66031	3.15736e-06	0.000245734
FOXO3	coding	358.764	1.61282	0.305468	5.27985	1.29292e-07	1.60503e-05
PDK4	coding	20935.4	1.62616	0.460631	3.53028	0.000415126	0.0123722
SPIDR	coding	178.654	1.6391	0.340795	4.80962	1.51215e-06	0.000135203
ZNF385C	coding	18.1612	1.64193	0.442491	3.71064	0.000206738	0.00739945
CRABP2	coding	69.0679	1.64398	0.413015	3.98045	6.8785e-05	0.00311211
MAX	coding	511.877	1.6579	0.271946	6.09643	1.0846e-09	3.017e-07
SLC27A6	coding	6.03634	1.68067	0.459805	3.65519	0.000256995	0.00871403
HIF3A	coding	35.474	1.69747	0.423271	4.01036	6.06262e-05	0.00282816
PDPN	coding	52.6065	1.70761	0.438399	3.89512	9.8151e-05	0.00414137
AMPD3	coding	590.874	1.71035	0.456152	3.7495	0.000177184	0.00659072
LOC101118573	coding	160.572	1.71057	0.35291	4.84704	1.25319e-06	0.000114685
STAT5A	coding	673.709	1.73714	0.386648	4.49282	7.02854e-06	0.000486482
CDS1	coding	6.16068	1.74369	0.460174	3.78921	0.000151128	0.00579407
NCEH1	coding	100.885	1.74607	0.256763	6.80035	1.04368e-11	5.59896e-09
TRIM63	coding	12249.3	1.75336	0.442952	3.95836	7.54671e-05	0.00337357
ARRDC2	coding	2055.48	1.76513	0.456951	3.86283	0.00011208	0.00453788
CCDC40	coding	21.7132	1.76699	0.460789	3.8347	0.000125719	0.00500909
FAM13A	coding	474.287	1.78661	0.337074	5.30036	1.15576e-07	1.47125e-05
WDR4	coding	66.2269	1.7928	0.41487	4.32136	1.55068e-05	0.000920663
GREB1	coding	22.2288	1.82659	0.36567	4.99518	5.87813e-07	6.08934e-05
LOC101102204	coding	8.19485	1.84597	0.459555	4.01686	5.89787e-05	0.0027685
ATCAY	coding	16.3774	1.86671	0.414427	4.50432	6.65868e-06	0.000474029
ANGPTL4	coding	197.249	1.91062	0.324524	5.88745	3.92205e-09	8.53813e-07
GADD45G	coding	422.354	1.91122	0.453113	4.21798	2.46505e-05	0.00132715
LOC106991529	coding	326.146	1.91627	0.364267	5.26063	1.43566e-07	1.76763e-05
LOC101121539	coding	199.744	1.93239	0.29881	6.46694	1.00009e-10	3.66397e-08
KCNMB4	coding	83.1515	1.93289	0.265554	7.27871	3.37015e-13	2.30105e-10
GLUL	coding	8190.15	1.96229	0.266483	7.36364	1.78965e-13	1.28011e-10
UCK2	coding	120.862	1.96873	0.339061	5.80642	6.38212e-09	1.26139e-06
SCN3B	coding	29.3205	1.98762	0.452291	4.39456	1.10998e-05	0.000697614
NOD2	coding	30.1054	2.00898	0.432915	4.64058	3.47435e-06	0.000266266
MUSTN1	coding	7689.99	2.03208	0.344243	5.90302	3.56911e-09	7.96142e-07
CDKN1A	coding	703.824	2.0376	0.307503	6.62628	3.44252e-11	1.43639e-08
KLHL30	coding	211.351	2.08221	0.314707	6.61634	3.68194e-11	1.48058e-08
SCPEP1	coding	410.467	2.0846	0.287704	7.24564	4.3041e-13	2.81095e-10
STRIP2	coding	446.656	2.0914	0.227556	9.19073	3.90202e-20	9.76869e-17
CDC26	coding	6.49434	2.09172	0.460599	4.5413	5.59089e-06	0.000409662
HMOX1	coding	471.043	2.13065	0.360197	5.91524	3.31386e-09	7.54204e-07
AQP3	coding	19.8288	2.14145	0.433868	4.93572	7.98546e-07	7.94368e-05
NPC1	coding	589.202	2.1579	0.361925	5.96228	2.48744e-09	6.02642e-07
CCDC146	coding	13.4827	2.20553	0.43076	5.1201	3.0538e-07	3.37287e-05
LOC101120934	coding	64.2241	2.21217	0.32746	6.75553	1.42317e-11	6.68047e-09
LOC101120716	coding	106.871	2.22105	0.396987	5.59477	2.20917e-08	3.7709e-06
PKHD1	coding	10.2161	2.22948	0.450668	4.94705	7.53483e-07	7.58353e-05
FOXO1	coding	679.635	2.25682	0.317354	7.11137	1.14894e-12	6.9033e-10
LOC105603631	coding	48.9014	2.2735	0.4167	5.45597	4.87068e-08	7.31625e-06
SH2D4A	coding	121.976	2.27791	0.371715	6.1281	8.8936e-10	2.52058e-07
GALNT15	coding	20.8727	2.34768	0.405138	5.79477	6.84134e-09	1.33459e-06
PFKFB4	coding	4048.31	2.43024	0.320989	7.5711	3.70067e-14	3.29712e-11
SLC43A2	coding	368.867	2.48486	0.295527	8.40822	4.16264e-17	6.94744e-14
SESN1	coding	1418.74	2.5035	0.258953	9.66778	4.13239e-22	1.24145e-18
PFKFB3	coding	3247.18	2.58746	0.333839	7.75062	9.14485e-15	9.81177e-12
ARMC12	coding	35.4784	2.96283	0.381987	7.75638	8.73895e-15	9.81177e-12
FKBP5	coding	1902.32	3.02468	0.375352	8.05824	7.74009e-16	1.16264e-12
LOC105611977	lncRNA	29.159	-3.25406	0.413352	-7.87238	3.4795e-15	4.35547e-12
LOC105609047	lncRNA	41.0093	-2.19918	0.412417	-5.33243	9.69083e-08	1.2997e-05
LOC105610886	lncRNA	13.9284	-1.96915	0.421106	-4.67614	2.92326e-06	0.000233912
LOC105604914	lncRNA	6.37906	-1.8276	0.460471	-3.96897	7.21828e-05	0.00324628
LOC106991092	lncRNA	10.2036	-1.80246	0.441205	-4.08531	4.40186e-05	0.00217501
LOC105611403	lncRNA	7.61813	-1.79804	0.447942	-4.014	5.96973e-05	0.0027935
LOC105604459	lncRNA	112.86	-1.68352	0.410472	-4.10143	4.10602e-05	0.00206276
LOC105605741	lncRNA	92.8801	-1.66864	0.371957	-4.48611	7.25336e-06	0.000497501
LOC105603774	lncRNA	286.331	-1.57635	0.256547	-6.14448	8.02246e-10	2.31741e-07
LOC105602640	lncRNA	69.6851	-1.55124	0.403544	-3.84403	0.000121032	0.00483518
LOC105611269	lncRNA	6.48549	-1.53541	0.448746	-3.42154	0.000622669	0.0167618
LOC105604561	lncRNA	20.3284	-1.45439	0.454122	-3.20263	0.00136179	0.0298619
LOC105602453	lncRNA	122.418	-1.41293	0.314513	-4.49244	7.04115e-06	0.000486482
LOC106991638	lncRNA	20.4548	-1.35954	0.369538	-3.67904	0.000234114	0.00808421
LOC106991082	lncRNA	291.621	-1.15996	0.272412	-4.25812	2.06158e-05	0.00116107
LOC106990587	lncRNA	23.0798	-1.14881	0.335424	-3.42495	0.000614914	0.0166426
LOC105604676	lncRNA	140.933	-1.14459	0.321838	-3.55641	0.000375956	0.0115485
LOC105603075	lncRNA	57.8437	-0.900473	0.302077	-2.98094	0.00287364	0.0498449
LOC105616808	lncRNA	163.35	-0.813519	0.267212	-3.04447	0.00233093	0.0434943
LOC105603392	lncRNA	33.1419	1.33765	0.411726	3.24888	0.0011586	0.0262495
LOC105602877	lncRNA	74.1149	1.38219	0.373941	3.69629	0.000218774	0.00769603
LOC105608763	lncRNA	89.4276	1.41556	0.323379	4.37739	1.20108e-05	0.000742448
LOC105603522	lncRNA	7.16329	1.44531	0.456378	3.1669	0.00154071	0.0325957
LOC106991289	lncRNA	6.62479	1.50901	0.459928	3.28097	0.00103452	0.0238703
LOC105616222	lncRNA	5.9984	1.51617	0.457865	3.3114	0.000928295	0.0221097
LOC106991634	lncRNA	403.707	1.54876	0.278298	5.56512	2.61976e-08	4.32433e-06
LOC101116687	lncRNA	99.5995	1.63032	0.340726	4.78485	1.71117e-06	0.000150313
LOC105616344	lncRNA	70.8813	1.82844	0.385376	4.74457	2.08949e-06	0.000177323
LOC105611558	lncRNA	46.2726	1.87446	0.428825	4.37116	1.23588e-05	0.000757718
LOC105609681	lncRNA	12.3154	2.2399	0.460663	4.86234	1.16003e-06	0.000110987
LOC106991804	lncRNA	89.3216	4.08657	0.355318	11.5012	1.30151e-30	4.8875e-27
XLOC_001369_LOC101110577	pseudogene	18.3499	-1.50286	0.430553	-3.49055	0.000482033	0.0140119
XLOC_002740_LOC101103815	pseudogene	534.402	-1.05185	0.237639	-4.42625	9.58838e-06	0.000626204
XLOC_000058_LOC101119529	pseudogene	206.861	1.08532	0.274321	3.95639	7.60894e-05	0.00337357
XLOC_000644_LOC101121401	pseudogene	191.987	1.08624	0.324711	3.34526	0.000822042	0.0204435
XLOC_004148_LOC105610748	pseudogene	19.2043	1.19139	0.383358	3.10777	0.00188502	0.037703
XLOC_000674_LOC106990906	pseudogene	27.9741	1.45453	0.367638	3.95642	7.60804e-05	0.00337357
XLOC_003312_LOC101101991	pseudogene	17.3798	1.64077	0.460903	3.55991	0.000370982	0.0114703
XLOC_003334_LOC101101991	pseudogene	85.7828	5.2339	0.403066	12.9852	1.48433e-38	7.43205e-35
XLOC_006553	unknown	39.3834	-2.8797	0.3738	-7.70384	1.32037e-14	1.32222e-11
XLOC_003911	unknown	11.3212	-2.64834	0.453714	-5.83704	5.31378e-09	1.0934e-06
XLOC_005746	unknown	20.7927	-2.6444	0.453767	-5.82766	5.62103e-09	1.14099e-06
XLOC_003894	unknown	11.8271	-2.28979	0.430544	-5.31837	1.04701e-07	1.37957e-05
XLOC_006506	unknown	14.3519	-2.23961	0.410274	-5.45882	4.79311e-08	7.27245e-06
XLOC_006584	unknown	13.4348	-2.18254	0.431327	-5.06006	4.19132e-07	4.49699e-05
XLOC_004034	unknown	21.4016	-2.12663	0.38415	-5.53594	3.09567e-08	4.89475e-06
XLOC_007263	unknown	39.6539	-2.07495	0.436196	-4.75692	1.96567e-06	0.000168075
XLOC_002380	unknown	26.9413	-1.94047	0.346346	-5.60269	2.11056e-08	3.64399e-06
XLOC_007529	unknown	9.34262	-1.91983	0.455274	-4.21687	2.47713e-05	0.00132889
XLOC_002547	unknown	42.1541	-1.91807	0.407192	-4.71046	2.47153e-06	0.000204464
XLOC_001833	unknown	6.26128	-1.83289	0.460921	-3.97658	6.99147e-05	0.00315372
XLOC_007653	unknown	77.0133	-1.7983	0.289554	-6.21061	5.27801e-10	1.68683e-07
XLOC_005174	unknown	256.419	-1.72252	0.384909	-4.47513	7.63639e-06	0.000521392
XLOC_007639	unknown	148.88	-1.69361	0.303918	-5.57258	2.50988e-08	4.23606e-06
XLOC_004332	unknown	4.59784	-1.66406	0.456428	-3.64584	0.000266522	0.00893622
XLOC_004465	unknown	48.3463	-1.65975	0.351753	-4.71851	2.37574e-06	0.000198256
XLOC_007825	unknown	21.9621	-1.64469	0.433514	-3.79386	0.000148323	0.0057719
XLOC_006745	unknown	8.59624	-1.59376	0.433156	-3.67942	0.000233769	0.00808421
XLOC_006507	unknown	4.15616	-1.59354	0.457838	-3.48058	0.000500334	0.0143192
XLOC_002538	unknown	18.5061	-1.5616	0.391978	-3.98389	6.77964e-05	0.00307665
XLOC_002379	unknown	22.3671	-1.5567	0.399251	-3.89905	9.65703e-05	0.00409769
XLOC_001371	unknown	3.72212	-1.50523	0.447056	-3.36699	0.000759943	0.0193149
XLOC_006032	unknown	21.3583	-1.50157	0.396049	-3.79138	0.000149814	0.00578498
XLOC_004436	unknown	9.91439	-1.46632	0.453068	-3.23643	0.00121037	0.0270148
XLOC_001280	unknown	11.8313	-1.44952	0.428031	-3.38648	0.000707942	0.0183661
XLOC_006878	unknown	36.9051	-1.44283	0.419406	-3.44018	0.000581318	0.0159343
XLOC_005181	unknown	3.44675	-1.4214	0.453258	-3.13596	0.00171293	0.0354896
XLOC_004193	unknown	7.5742	-1.40894	0.460882	-3.05704	0.00223533	0.0422883
XLOC_006697	unknown	14.1273	-1.40267	0.405722	-3.45721	0.000545791	0.0152103
XLOC_008053	unknown	13.9089	-1.39333	0.436428	-3.19259	0.00141004	0.0307405
XLOC_001330	unknown	15.8821	-1.38196	0.416385	-3.31894	0.000903592	0.0217863
XLOC_005614	unknown	28.3357	-1.3819	0.385654	-3.58327	0.000339318	0.0107529
XLOC_003181	unknown	10.5739	-1.36472	0.422452	-3.23046	0.00123591	0.027544
XLOC_000122	unknown	12.0875	-1.32951	0.438111	-3.03464	0.00240823	0.0443673
XLOC_004473	unknown	126.643	-1.26744	0.334499	-3.78908	0.000151207	0.00579407
XLOC_004144	unknown	37.3968	-1.24577	0.402352	-3.09622	0.00196005	0.038587
XLOC_006626	unknown	185.021	-1.22899	0.311636	-3.94367	8.02429e-05	0.00352435
XLOC_002541	unknown	48.7573	-1.22685	0.392135	-3.12865	0.00175612	0.035994
XLOC_006690	unknown	15.1684	-1.20588	0.397267	-3.03544	0.00240189	0.0443673
XLOC_005155	unknown	248.043	-1.20396	0.288854	-4.16805	3.07218e-05	0.00159128
XLOC_003584	unknown	113.785	-0.89331	0.291368	-3.06592	0.00217004	0.0413133
XLOC_004491	unknown	138.821	-0.832147	0.241463	-3.44627	0.000568389	0.015714
XLOC_004461	unknown	274.837	-0.817407	0.245676	-3.32718	0.000877295	0.0213579
XLOC_006867	unknown	357.461	-0.812692	0.249475	-3.25761	0.00112354	0.0256095
XLOC_005153	unknown	52.7534	1.01209	0.327547	3.08991	0.00200218	0.039262
XLOC_006522	unknown	26.8112	1.05428	0.345895	3.04798	0.00230386	0.0431499
XLOC_003587	unknown	39.5246	1.12653	0.288644	3.90283	9.50739e-05	0.00405712
XLOC_001264	unknown	1377.83	1.24489	0.321745	3.86919	0.000109199	0.00448165
XLOC_001924	unknown	14.5505	1.29263	0.427592	3.02303	0.00250255	0.0456198
XLOC_000278	unknown	8.1361	1.37172	0.451409	3.03876	0.00237552	0.0441071
XLOC_004779	unknown	37.5634	1.42252	0.427502	3.32751	0.000876244	0.0213579
XLOC_006045	unknown	15.9403	1.44892	0.402527	3.59955	0.000318766	0.0103194
XLOC_005792	unknown	316.328	1.57004	0.271179	5.78968	7.05224e-09	1.3581e-06
XLOC_000678	unknown	5.90858	1.63891	0.459423	3.56733	0.000360636	0.0112388
XLOC_005178	unknown	24.6833	1.64905	0.4032	4.0899	4.31565e-05	0.00214521
XLOC_005179	unknown	23.0883	1.80698	0.418325	4.31956	1.56343e-05	0.000924578
XLOC_002223	unknown	39.3142	1.8488	0.410921	4.49916	6.8224e-06	0.000481124
XLOC_002225	unknown	20.1753	1.95012	0.445444	4.37792	1.19818e-05	0.000742448
