# Supplementary material for: Sheep skeletal muscle transcriptome analysis reveals muscle growth regulatory lncRNAs
Source: PeerJ. 2018 Apr 11;6:e4619. doi: 10.7717/peerj.4619 (PMC5899421; doi:10.7717/peerj.4619)
Supplement: Table S3 — Sheet 1: Pearson correlation r-value matrix. Sheet 2: Pearson correlation p-value matrix. [file peerj-06-4619-s003.xlsx]

## Sheet: Co-expression r-value
gene-id	coding.AATF	coding.ABAT	coding.ABCC5	coding.ABHD6	coding.ACACB	coding.ACAD11	coding.ACTC1	coding.ACTR3B	coding.ADAMTS10	coding.ADAMTS16	coding.ADAMTS8	coding.ADCY1	coding.ADHFE1	coding.ADIPOR2	coding.ADTRP	coding.AEN	coding.AGL	coding.AHCYL2	coding.AHDC1	coding.AK4	coding.ALAD	coding.ALAS1	coding.ALDH2	coding.ALDH5A1	coding.ALS2CL	coding.AMOTL1	coding.AMPD1	coding.AMPD3	coding.ANGPTL4	coding.ANK2	coding.ANO6	coding.AOX1	coding.APBB2	coding.APIP	coding.AQP3	coding.ARHGAP23	coding.ARHGEF9	coding.ARL8B	coding.ARMC12	coding.ARMC2	coding.ARRDC2	coding.ART3	coding.ARX	coding.ASB12	coding.ASB15	coding.ASB16	coding.ASS1	coding.ATCAY	coding.ATP2A2
lncRNA.LOC101116687	0.194388	-0.406277	0.0844267	-0.146982	0.348989	0.239916	-0.0267677	0.0514655	-0.0736031	-0.288649	-0.290588	-0.00663459	-0.154903	0.237772	0.0691588	-0.0281065	-0.0177203	-0.503065	-0.16556	-0.209489	-0.0426095	-0.356878	-0.201365	-0.0726751	0.208697	-0.233782	-0.0625899	0.32324	0.101213	-0.125011	0.132288	-0.0281304	0.187249	0.367661	0.00689092	-0.265473	-0.0406095	0.224953	0.207659	0.335302	0.162744	0.0089058	-0.270695	-0.326579	-0.228836	-0.127438	-0.267245	0.271085	-0.112382
lncRNA.LOC105602453	0.251205	0.578981	-0.030983	0.550022	0.140165	-0.452257	0.0809201	0.353307	0.279791	0.797312	0.643341	0.140744	0.665668	0.121294	0.0403994	-0.0147758	-0.355425	0.0235219	0.707695	-0.0360994	0.244823	0.84175	0.775608	0.18381	0.167548	0.76806	0.498116	-0.0323585	0.0747249	-0.00463165	-0.413652	-0.115876	-0.0667619	-0.00802143	0.0707216	0.76906	0.284551	0.125453	-0.0128026	-0.217421	0.0403151	-0.314809	-0.0536776	0.788582	-0.155727	0.71754	0.848558	0.0454153	0.261128
lncRNA.LOC105602640	0.0722694	0.2997	-0.143029	0.196706	0.0146309	0.221469	-0.103149	0.197202	0.0278211	0.549491	0.53668	0.0928167	0.464544	-0.0400279	-0.0587048	-0.288606	-0.156685	-0.080934	0.488676	-0.185965	-0.0590764	0.406003	0.453457	0.310417	-0.0331991	0.556393	0.445119	-0.150733	-0.0911905	-0.0354619	-0.0400465	-0.489248	-0.124565	-0.216899	-0.0785971	0.521035	-0.170092	-0.0218995	-0.0146278	-0.13914	-0.151748	-0.421212	-0.124876	0.385366	-0.148953	0.422536	0.530403	0.0786906	-0.027556
lncRNA.LOC105602877	-0.138681	-0.249096	0.15549	-0.158496	-0.018797	-0.0708346	-0.190411	-0.0741653	-0.185673	-0.252216	-0.288274	0.021145	-0.212506	-0.215984	0.192055	-0.0416368	-0.00708327	0.0713665	-0.0183832	-0.0941864	0.0386711	-0.214773	-0.297561	0.181434	-0.23381	-0.107308	0.297941	-0.235612	-0.106543	-0.167512	-0.0578457	0.037512	0.0173559	-0.0467734	-0.115519	-0.123877	-0.233611	-0.249391	-0.013257	-0.0925585	-0.0964312	0.257766	0.0328911	-0.0166378	-0.0993114	0.111745	-0.221236	0.60563	0.154232
lncRNA.LOC105603075	-0.110356	-0.0876782	0.196513	0.0508615	-0.0691875	-0.365266	-0.151702	-0.0911339	-0.0658046	-0.0386163	-0.0628548	0.178925	0.0989366	-0.143432	0.308679	-0.0360332	-0.122023	0.102397	0.287344	0.0253686	-0.00274088	0.219138	0.0565225	0.45394	-0.204258	0.295836	0.502902	-0.189881	-0.10928	-0.026663	-0.238319	-0.152623	-0.167266	0.0510897	-0.13203	0.0451972	-0.0503779	-0.311935	-0.211174	-0.186645	-0.137397	-0.0432258	-0.185856	0.317504	-0.0418982	0.413903	0.063565	0.235969	0.370489
lncRNA.LOC105603392	0.689372	-0.112734	-0.226749	-0.096245	0.652501	-0.201685	0.665373	0.667658	0.636509	0.0264801	-0.149241	-0.151638	0.113276	0.678487	0.4968	0.327026	-0.402966	-0.524037	0.174805	-0.447693	0.561208	0.221855	0.192975	-0.0888466	0.55381	0.257531	-0.107167	0.623552	0.712128	-0.373454	-0.155771	0.144471	0.39277	0.56263	0.664136	0.0810662	-0.0908183	0.177464	0.732364	0.165845	0.743606	-0.155926	-0.245136	0.165599	-0.408966	0.278091	0.090259	0.318933	-0.117863
lncRNA.LOC105603522	0.544524	-0.145343	0.113658	-0.166323	0.539788	-0.147599	0.586232	0.427201	0.476016	-0.0464827	-0.152005	0.198949	0.0747088	0.565557	0.211052	0.293779	-0.513865	-0.463324	0.0640683	-0.508404	0.513877	-0.0689566	0.109652	-0.227304	0.588263	0.00641438	-0.192409	0.546165	0.415042	-0.373558	-0.183686	0.137289	0.363906	0.483549	0.691308	0.0814188	-0.297928	0.0927824	0.470104	0.332001	0.560035	-0.252712	0.326348	-0.153977	-0.490524	-0.0013781	-0.0377529	0.178266	0.201496
lncRNA.LOC105603774	-0.0712389	-0.0283766	0.510819	0.0120857	-0.0889662	-0.277327	-0.166628	-0.182323	-0.198057	-0.0617221	0.00528735	0.731143	0.263754	-0.129758	-0.044867	-0.233727	-0.405455	-0.358909	0.278986	-0.424752	-0.172548	0.000957176	0.0155132	0.200711	-0.146164	0.190789	0.1604	-0.123817	-0.263288	-0.190422	-0.442216	-0.343133	-0.555554	0.145012	-0.144565	-0.0672313	-0.22988	-0.324447	-0.173024	-0.209192	-0.17902	-0.466728	-0.042799	-0.0883311	-0.387353	0.0854	-0.00350554	0.299224	0.722448
lncRNA.LOC105604459	-0.680898	-0.433548	-0.168145	-0.361442	-0.597327	0.383007	-0.353017	-0.653279	-0.556278	-0.475079	-0.401622	-0.407262	-0.740598	-0.577239	-0.140009	-0.28904	0.885083	0.513389	-0.677245	0.682369	-0.558801	-0.464774	-0.705467	0.142911	-0.549431	-0.539628	-0.376587	-0.436633	-0.388268	0.577695	0.390309	0.312714	-0.0616096	-0.523955	-0.381946	-0.6579	0.201829	-0.0858794	-0.451637	-0.0709145	-0.476962	0.624783	0.146641	-0.563954	0.611983	-0.593571	-0.58374	-0.401468	-0.116052
lncRNA.LOC105604561	-0.216002	-0.0910217	-0.125214	-0.160867	-0.153386	-0.408067	-0.219102	-0.174847	-0.289093	0.0479262	0.0816983	0.156026	-0.0449016	-0.263146	-0.17809	-0.229345	0.07199	-0.0522418	-0.0371196	-0.0482858	0.0957204	0.229073	-0.00452188	0.414797	-0.269257	0.0424136	0.193472	-0.243145	-0.220498	0.00211137	-0.404112	0.173259	-0.166263	0.061281	-0.220371	-0.085792	0.321427	-0.322544	-0.203092	-0.230583	-0.25898	0.215754	-0.166906	0.0185648	-0.163458	-0.000974357	0.0246978	0.0792923	0.463456
lncRNA.LOC105604676	-0.298188	-0.00404452	0.00237238	-0.169144	-0.276268	-0.0139193	-0.192915	-0.178902	-0.266791	-0.0121364	0.0953038	0.296377	0.120265	-0.292115	-0.275866	-0.60875	0.0675085	0.0401233	0.184632	-0.117641	-0.289048	0.228721	-0.0523398	0.467892	-0.328305	0.28998	0.0557604	-0.334898	-0.250276	0.122362	-0.117824	-0.0778551	-0.335123	0.047118	-0.178698	-0.0176466	0.100664	-0.341793	-0.0833854	-0.424986	-0.307444	-0.0916705	-0.0643484	0.0154847	0.0146359	0.0180394	0.000684683	-0.114221	0.169966
lncRNA.LOC105604914	-0.19426	-0.127864	0.257015	0.127619	-0.240477	0.137811	-0.159578	-0.190206	-0.0928015	0.0111054	0.0178309	-0.0978089	0.0502671	-0.153102	0.139275	0.075033	0.0555841	0.142952	-0.00760264	0.0817718	-0.324729	-0.0102785	-0.010827	0.166382	-0.293021	0.0991824	0.27315	-0.181081	-0.282163	0.0686366	0.339684	-0.410552	-0.294636	-0.22576	-0.200205	-0.0352015	-0.142738	-0.339698	-0.313106	-0.0967808	-0.236733	-0.146059	-0.00549705	0.0431114	0.215282	0.0654364	0.0629443	-0.102374	0.141927
lncRNA.LOC105605741	0.0619547	0.28978	0.396584	0.634298	0.0022985	-0.453096	-0.194767	0.170041	0.0945859	0.629683	0.480677	0.519983	0.741686	-0.101629	-0.057222	-0.202294	-0.478061	0.0274015	0.827592	-0.115463	-0.00164019	0.674919	0.596366	0.129142	-0.0334179	0.772247	0.782445	-0.22493	-0.154385	0.0750566	-0.41667	-0.379893	-0.393326	-0.125634	-0.171761	0.585763	-0.0440495	-0.20183	-0.176338	-0.391525	-0.192493	-0.368318	-0.0729862	0.712909	-0.175895	0.71662	0.666229	0.309257	0.431052
lncRNA.LOC105608763	0.830824	0.155553	-0.150194	0.0423661	0.857234	0.00650247	0.399158	0.798113	0.596362	0.184874	0.0648799	0.0190996	0.392726	0.739468	0.238091	0.345712	-0.611008	-0.597039	0.364106	-0.670513	0.606473	0.1667	0.364465	-0.193667	0.575018	0.245751	0.115462	0.67635	0.608378	-0.484176	-0.0157312	-0.0303088	0.524861	0.499385	0.464671	0.323294	-0.283572	0.325711	0.823133	0.369071	0.695707	-0.258381	-0.181814	0.347153	-0.461063	0.4635	0.250566	0.660047	-0.124764
lncRNA.LOC105609047	-0.242547	-0.0583705	0.347014	0.285481	-0.253437	-0.363277	-0.187583	-0.194498	-0.322469	0.103554	0.219312	0.459344	0.105118	-0.301162	-0.309482	-0.110483	-0.149788	0.247423	0.139254	-0.0177734	0.0213326	0.179618	0.115136	0.0977153	-0.0938317	0.230164	0.343615	-0.262493	-0.380227	-0.00288714	-0.437055	-0.177842	-0.341364	-0.0811497	-0.205272	0.138019	0.025007	-0.435846	-0.270365	-0.190969	-0.29733	0.00313839	0.393238	0.0631737	-0.201017	0.0697155	0.107698	-0.100835	0.613733
lncRNA.LOC105609681	0.260303	-0.250966	0.203962	-0.258546	0.384563	-0.0445725	0.0883242	0.0884572	0.11366	-0.165854	-0.186929	-0.106123	-0.11722	0.342699	0.00622277	0.287893	-0.246466	-0.177613	-0.114608	-0.241514	0.195653	-0.251163	-0.033776	-0.13896	0.304008	-0.254026	-0.225001	0.413267	0.118339	-0.220725	0.00500701	0.209787	0.362456	0.39993	0.143217	-0.00234403	-0.274708	0.0658961	0.340317	0.499601	0.264554	0.045762	0.676124	-0.196221	-0.213192	-0.0996669	-0.133362	0.0148867	0.104432
lncRNA.LOC105610886	-0.245316	0.206004	-0.0318177	0.0717177	-0.141644	0.167787	-0.130771	-0.15078	-0.24691	-0.102737	0.0733965	-0.199667	-0.115583	-0.181039	-0.0105861	0.00475483	0.227333	0.332354	-0.16802	0.171418	-0.0303878	0.0919558	-0.118774	0.0674123	-0.139324	0.069575	-0.164407	-0.176941	-0.0585116	-0.154459	0.0708951	-0.0133639	-0.0797411	0.0457815	-0.165056	0.0515269	0.225738	0.240397	0.0551585	0.0185033	-0.126786	0.14411	-0.107729	0.0396002	0.100909	-0.117276	-0.0554391	-0.173909	-0.144681
lncRNA.LOC105611269	-0.235638	-0.160306	-0.0788372	0.109974	-0.257691	0.50196	-0.144992	-0.1782	-0.207706	-0.0937432	-0.0529664	-0.132483	-0.122748	-0.182059	-0.211896	0.0328055	0.331642	0.17601	-0.153748	0.165128	-0.323325	-0.249085	-0.158867	0.0527961	-0.271265	-0.0680377	-0.023577	-0.18129	-0.287778	0.306813	0.492243	-0.426153	-0.21007	-0.415423	-0.161466	-0.0373006	-0.159121	-0.0914799	-0.248285	0.037537	-0.22504	-0.0995437	0.0761537	-0.199981	0.180951	-0.121728	-0.0814662	-0.180647	-0.219173
lncRNA.LOC105611403	0.021671	0.187209	0.440309	0.190081	-0.0589035	-0.400804	-0.196512	-0.0907944	-0.14277	0.352852	0.306813	0.69114	0.503447	-0.109498	-0.207146	-0.293218	-0.566687	-0.361149	0.561009	-0.469527	-0.148074	0.24517	0.390917	0.152405	-0.0397209	0.422989	0.32362	-0.134359	-0.307339	-0.244787	-0.558439	-0.415384	-0.606218	0.31293	-0.176331	0.279231	-0.166504	-0.383778	-0.210666	-0.294999	-0.206909	-0.626773	-0.0216963	0.0819908	-0.537249	0.229532	0.380122	0.149524	0.31493
lncRNA.LOC105611558	0.476715	-0.238403	0.193799	-0.11124	0.582138	-0.0366322	0.203689	0.241988	0.223299	-0.142489	-0.164762	-0.0147196	0.0257122	0.547154	0.0621174	0.435162	-0.385096	-0.357815	-0.0945728	-0.366306	0.333786	-0.177103	0.0832767	-0.301533	0.491987	-0.197277	-0.255053	0.64543	0.266048	-0.308204	-0.0214859	0.115582	0.375183	0.507783	0.247349	-0.0316356	-0.253372	0.210694	0.462903	0.632863	0.424531	-0.0494908	0.410908	-0.176154	-0.36931	-0.0803261	-0.0852763	0.0679679	0.166354
lncRNA.LOC105611977	-0.0448165	0.131505	0.0949457	0.135147	-0.120595	-0.464531	-0.216048	-0.106493	-0.141383	0.46332	0.371366	0.285762	0.389541	-0.16376	-0.247731	-0.189559	-0.404561	-0.119393	0.421537	-0.242681	0.0857426	0.424645	0.484696	0.329502	-0.062092	0.39801	0.428661	-0.20029	-0.2578	-0.218919	-0.604101	-0.312902	-0.473826	0.201029	-0.220357	0.361155	-0.00882172	-0.440968	-0.296214	-0.273607	-0.261165	-0.349862	-0.0872299	0.244713	-0.454412	0.238721	0.498971	-0.06964	0.222544
lncRNA.LOC105616222	0.866644	0.0481457	-0.270411	0.0152112	0.757369	-0.18148	0.908138	0.881985	0.848087	0.0949715	0.000187624	0.0400767	0.261659	0.844595	0.426778	0.504284	-0.570101	-0.584877	0.194268	-0.525708	0.805117	0.144392	0.332631	-0.38644	0.83787	0.167488	-0.130712	0.765178	0.859066	-0.459131	-0.159191	0.0999831	0.547738	0.47972	0.865631	0.223216	-0.190602	0.295211	0.807455	0.231999	0.934815	-0.299335	-0.1228	0.172606	-0.532372	0.241936	0.115731	0.347339	-0.105918
lncRNA.LOC105616344	0.803965	-0.067075	-0.174991	0.0307064	0.905204	-0.0305139	0.37894	0.600238	0.578667	0.0511247	-0.0621878	-0.101466	0.26884	0.893201	0.347235	0.693736	-0.432308	-0.451847	0.0263235	-0.329711	0.614143	0.12681	0.35349	-0.435014	0.768313	0.00160358	-0.217767	0.934309	0.679375	-0.443751	0.0659229	0.0892695	0.63235	0.533936	0.403455	0.109838	-0.104567	0.543652	0.723237	0.81154	0.697761	-0.0786858	-0.125363	0.150979	-0.365408	0.141461	0.13421	0.124709	-0.103275
lncRNA.LOC105616808	0.0549202	0.68169	-0.234076	0.33806	0.0379784	0.11679	0.0208966	0.16033	0.0645845	0.274615	0.439484	-0.170754	0.222692	0.0428215	-0.152465	0.0926537	0.0176508	0.246778	0.154586	0.194991	0.247677	0.286948	0.332953	0.148478	0.127912	0.244562	0.130037	-0.0455876	0.0525192	-0.0693516	0.0415247	-0.0141126	0.197136	-0.036174	-0.0197085	0.535934	0.355952	0.516966	-0.00235859	0.0601313	0.0440994	-0.131057	-0.12945	0.482711	0.130828	0.316759	0.354953	-0.0907774	-0.0939794
lncRNA.LOC106990587	0.319315	0.264988	0.0976243	0.268023	0.257767	-0.321134	0.0328965	0.337303	0.195693	0.62588	0.490803	0.434507	0.749138	0.239621	-0.108063	-0.117385	-0.663181	-0.335492	0.675819	-0.569379	0.223985	0.690847	0.722232	0.151812	0.231426	0.711323	0.330909	0.105115	0.0972146	-0.435423	-0.49753	-0.474489	-0.326977	0.329587	0.0318818	0.629014	-0.0960296	-0.205375	0.232866	-0.164723	0.0666585	-0.57174	-0.108866	0.485321	-0.581654	0.450835	0.734534	0.0692619	0.208728
lncRNA.LOC106991082	-0.275369	0.398703	0.297378	0.340441	-0.230918	-0.155714	-0.227752	-0.204413	-0.253638	-0.0642942	0.18107	0.0967812	0.077018	-0.302445	0.0851911	-0.107478	0.0521564	0.408458	0.245566	0.260853	-0.120015	0.193712	0.00713767	0.409797	-0.241727	0.348378	0.391267	-0.338548	-0.288304	0.0734517	-0.115887	-0.0595915	-0.161489	-0.00658129	-0.211959	0.229862	0.230073	0.122926	-0.28971	-0.160404	-0.249791	-0.05004	-0.039234	0.401538	0.202906	0.414522	0.0481045	0.0641785	0.345462
lncRNA.LOC106991092	0.137098	0.399888	0.362945	0.563706	0.0361052	-0.406425	-0.0392997	0.175783	0.0767785	0.454592	0.450675	0.576103	0.655688	0.0118154	-0.0728648	-0.197695	-0.498663	-0.0126318	0.813623	-0.225908	0.0231786	0.607448	0.576967	0.335904	0.042798	0.801817	0.634727	-0.107144	-0.163959	0.0424047	-0.449266	-0.397115	-0.329437	0.0885488	0.0140565	0.610899	0.00212084	-0.165072	-0.133367	-0.280227	-0.0860822	-0.521849	0.032941	0.647847	-0.221984	0.754341	0.588692	0.121176	0.530633
lncRNA.LOC106991289	0.484733	-0.083809	-0.0110764	-0.141613	0.319644	-0.274702	0.623518	0.444068	0.42531	-0.0929479	-0.0756343	0.201514	0.0711335	0.440599	0.210205	0.208881	-0.510362	-0.638187	0.10346	-0.550732	0.356993	-0.147771	0.120621	-0.278983	0.489648	-0.0301463	-0.207647	0.453724	0.503378	-0.447429	-0.363403	-0.101195	-0.000323352	0.578636	0.429141	-0.056498	-0.271724	-0.142215	0.51077	-0.14665	0.636672	-0.441363	-0.111316	-0.175942	-0.598397	-0.0437521	-0.0916621	0.213012	-0.189827
lncRNA.LOC106991634	0.587427	-0.358904	-0.10094	-0.15937	0.655665	0.0234608	0.490668	0.601773	0.531734	-0.215163	-0.388956	-0.0557091	0.0518248	0.611792	0.384295	0.429447	-0.391363	-0.403035	0.144041	-0.491322	0.508185	-0.0567816	-0.0121516	-0.0531544	0.397729	0.132088	-0.0511776	0.554891	0.586154	-0.323144	0.106928	-0.0438306	0.379363	0.384708	0.527163	0.0403795	-0.474282	0.0509413	0.7496	0.286232	0.675343	-0.152468	0.0403363	0.0780777	-0.418121	0.283911	-0.100636	0.587676	-0.0756577
lncRNA.LOC106991638	0.0714126	0.0597856	0.673813	0.46864	0.0139965	-0.358752	-0.088507	-0.00541602	-0.0851256	0.212099	0.16166	0.775027	0.466632	-0.010482	-0.184491	-0.295987	-0.550858	-0.228489	0.484154	-0.299162	-0.115402	0.186291	0.317533	-0.161988	0.230547	0.355001	0.37436	-0.0513807	-0.176308	-0.215159	-0.491464	-0.345949	-0.432714	0.265934	-0.0826292	0.239664	0.0326301	-0.20642	-0.151168	-0.264865	-0.0956581	-0.372789	-0.00283667	0.15377	-0.349557	0.231166	0.309343	0.142356	0.452056
lncRNA.LOC106991804	0.813285	-0.0516911	-0.167565	0.0194224	0.886271	-0.0871423	0.528604	0.806368	0.672675	0.0296452	-0.126624	-0.122434	0.208901	0.796225	0.350024	0.544838	-0.484159	-0.566987	0.200788	-0.4796	0.689957	0.0278304	0.238521	-0.347333	0.664696	0.0416961	-0.0246407	0.745785	0.753948	-0.396482	0.0135189	0.14267	0.641245	0.511897	0.524477	0.238177	-0.221835	0.438204	0.865363	0.419982	0.831166	-0.09744	-0.0836708	0.246932	-0.452473	0.352949	0.0927322	0.643939	-0.239905
pseudogene.XLOC_000058_LOC101119529	0.322573	-0.145288	-0.235023	0.00175834	0.326552	-0.0838372	0.188208	0.297508	0.376248	-0.0234769	-0.22225	-0.331932	-0.018168	0.301421	0.230426	0.369966	0.0594685	-0.00492619	0.118293	0.112936	0.173579	0.0236963	-0.0108133	-0.126919	0.0772658	-0.0141284	-0.137142	0.313055	0.31549	0.414745	0.136762	0.319259	0.336243	-0.178172	0.2455	-0.0132072	-0.220056	0.258468	0.29911	0.264251	0.326688	0.17859	0.268379	0.166011	0.082316	0.280235	-0.0344298	0.258866	-0.0730033
pseudogene.XLOC_000644_LOC101121401	0.882198	0.0796784	-0.203173	0.00847241	0.826681	-0.210113	0.621862	0.714301	0.691233	0.220184	0.146657	0.155124	0.444634	0.895685	0.258611	0.56656	-0.6859	-0.680609	0.195651	-0.612284	0.715288	0.214013	0.521695	-0.430153	0.856705	0.143023	-0.207509	0.892284	0.69853	-0.587238	-0.226423	-0.0264314	0.414052	0.625473	0.599493	0.230018	-0.193635	0.3078	0.718904	0.515822	0.768856	-0.415467	-0.11894	0.102595	-0.67328	0.123678	0.250589	0.117081	-0.0404361
pseudogene.XLOC_000674_LOC106990906	0.839431	0.0662845	-0.0356604	0.150231	0.802429	-0.232199	0.687282	0.836052	0.726823	0.13975	0.0214223	0.0243977	0.356421	0.755203	0.364776	0.372431	-0.673741	-0.606098	0.436122	-0.581252	0.712045	0.200962	0.377182	-0.167021	0.706321	0.336447	0.187202	0.668042	0.686646	-0.381384	-0.201372	0.0352719	0.471069	0.60632	0.712871	0.366539	-0.232994	0.291247	0.736196	0.193847	0.818225	-0.344314	-0.118854	0.357924	-0.56359	0.530309	0.211871	0.590732	-0.0406352
pseudogene.XLOC_001369_LOC101110577	0.333996	0.26633	-0.0810048	0.338665	0.217765	-0.307389	0.0505362	0.289227	0.308042	0.542506	0.295128	0.18991	0.64864	0.316633	-0.0220525	0.0990724	-0.47723	-0.0939232	0.584939	-0.215113	0.22784	0.607061	0.725065	0.103682	0.272457	0.501358	0.222008	0.117757	0.1747	-0.229211	-0.343873	-0.30628	-0.180166	0.0578093	0.076508	0.682273	0.0287567	-0.0304541	0.0411027	-0.0282634	0.0927285	-0.382039	-0.0434005	0.60236	-0.327984	0.511268	0.784728	-0.0618359	0.112025
pseudogene.XLOC_002740_LOC101103815	0.242527	0.360097	0.257251	0.572472	0.227125	-0.31615	-0.0466054	0.290382	0.179487	0.379165	0.263783	0.170446	0.523588	0.112804	0.055055	-0.0585868	-0.405142	0.0168753	0.792967	-0.083982	0.124479	0.526644	0.485063	0.344673	0.0859666	0.740078	0.657125	-0.0204756	0.004257	0.0846986	-0.273842	-0.198766	-0.0654649	0.148645	0.0265999	0.64879	0.0392927	0.139615	0.0324282	-0.142367	0.0712111	-0.328217	-0.0347913	0.785114	-0.111769	0.920854	0.556073	0.399555	0.256436
pseudogene.XLOC_003312_LOC101101991	-0.0515295	-0.277237	0.263277	0.0765912	-0.00618711	0.0684857	-0.0457643	-0.120659	-0.0315751	-0.257279	-0.228241	-0.125227	-0.222544	0.0533067	0.630068	0.385332	0.205824	0.267184	-0.315933	0.278283	-0.235732	-0.265266	-0.216295	-0.554378	0.0963626	-0.335086	-0.119714	0.105136	0.0888232	-0.161548	0.247157	-0.040316	0.129615	-0.224152	-0.0814301	-0.311745	-0.104835	0.0428635	-0.0110892	0.321299	0.000405109	0.393104	0.107899	-0.177923	0.232024	-0.24061	-0.247709	-0.138548	-0.103431
pseudogene.XLOC_003334_LOC101101991	0.778453	-0.0856084	-0.226466	-0.0907479	0.674755	-0.156239	0.915346	0.751865	0.785638	-0.0142763	-0.138286	0.0117797	0.0926347	0.792448	0.455634	0.497638	-0.493938	-0.586692	0.0604159	-0.482927	0.721425	0.0214961	0.206718	-0.396587	0.793969	0.0555868	-0.249007	0.747425	0.829366	-0.447529	-0.150778	0.0958087	0.486437	0.534061	0.870785	0.0737002	-0.21048	0.223527	0.739022	0.233029	0.90547	-0.287834	-0.133557	-0.0170025	-0.508292	0.0725094	-0.00714749	0.206714	-0.205834
pseudogene.XLOC_004148_LOC105610748	0.108237	-0.0201129	0.350556	-0.200529	0.106823	-0.0423774	-0.012638	0.049336	0.0237335	-0.185082	-0.197416	0.470476	0.129385	0.0114002	0.284505	-0.154669	-0.391251	-0.434357	0.251156	-0.541568	-0.10619	-0.265826	-0.141518	0.082914	-0.0855828	0.00439644	0.193178	-0.0577666	-0.0460753	-0.371377	-0.0932229	-0.2296	-0.185599	0.199083	0.0938037	-0.0965604	-0.443621	-0.255055	0.0435862	-0.150133	0.0401957	-0.348835	-0.169381	-0.11786	-0.327212	0.134775	-0.147692	0.688114	0.16373
[truncated: 655 more columns]

## Sheet: Co-expression p-value
gene-id	coding.AATF	coding.ABAT	coding.ABCC5	coding.ABHD6	coding.ACACB	coding.ACAD11	coding.ACTC1	coding.ACTR3B	coding.ADAMTS10	coding.ADAMTS16	coding.ADAMTS8	coding.ADCY1	coding.ADHFE1	coding.ADIPOR2	coding.ADTRP	coding.AEN	coding.AGL	coding.AHCYL2	coding.AHDC1	coding.AK4	coding.ALAD	coding.ALAS1	coding.ALDH2	coding.ALDH5A1	coding.ALS2CL	coding.AMOTL1	coding.AMPD1	coding.AMPD3	coding.ANGPTL4	coding.ANK2	coding.ANO6	coding.AOX1	coding.APBB2	coding.APIP	coding.AQP3	coding.ARHGAP23	coding.ARHGEF9	coding.ARL8B	coding.ARMC12	coding.ARMC2	coding.ARRDC2	coding.ART3	coding.ARX	coding.ASB12	coding.ASB15	coding.ASB16	coding.ASS1	coding.ATCAY	coding.ATP2A2
lncRNA.LOC101116687	0.34132	0.0394442	0.681766	0.473677	0.0805679	0.237797	0.896725	0.802833	0.720844	0.152691	0.14983	0.974339	0.449897	0.242144	0.737096	0.891589	0.931531	0.00880405	0.418933	0.30437	0.836264	0.073503	0.323927	0.724228	0.306244	0.250371	0.761319	0.107239	0.622738	0.54287	0.519441	0.891497	0.359684	0.064626	0.973348	0.189945	0.843854	0.26922	0.30871	0.0940324	0.426999	0.965559	0.181051	0.103453	0.26082	0.535002	0.186893	0.180399	0.584659
lncRNA.LOC105602453	0.215764	0.00194144	0.880568	0.00360248	0.494645	0.0203584	0.694345	0.0766393	0.166259	1.08135e-06	0.000392114	0.492846	0.000206157	0.555024	0.844653	0.942888	0.0747671	0.909194	5.26075e-05	0.86102	0.228045	7.08558e-08	3.2467e-06	0.368733	0.413287	4.62827e-06	0.00960584	0.875306	0.71676	0.982085	0.0356744	0.572959	0.745908	0.968978	0.731369	4.41929e-06	0.158867	0.541434	0.950505	0.286	0.844973	0.117254	0.794532	1.70853e-06	0.447461	3.69171e-05	4.3382e-08	0.825639	0.197569
lncRNA.LOC105602640	0.725709	0.136894	0.485781	0.335481	0.943447	0.2769	0.616067	0.33424	0.892684	0.0036417	0.00470397	0.652008	0.016807	0.846064	0.775751	0.152754	0.444637	0.694295	0.0113042	0.363046	0.774367	0.0395901	0.0199865	0.122736	0.872092	0.00315924	0.022688	0.462337	0.657738	0.863452	0.845994	0.0111946	0.544322	0.287186	0.702722	0.00634662	0.406128	0.915434	0.943459	0.49784	0.459291	0.0321141	0.543311	0.0518724	0.4677	0.0315213	0.00531357	0.702384	0.893701
lncRNA.LOC105602877	0.499271	0.219772	0.448162	0.439325	0.927381	0.730955	0.35148	0.718796	0.363816	0.213861	0.153249	0.918338	0.297299	0.289273	0.347259	0.839954	0.972605	0.729009	0.928976	0.647198	0.851224	0.292053	0.139856	0.375061	0.250313	0.601835	0.139327	0.246574	0.604442	0.41339	0.778952	0.855637	0.932936	0.820507	0.574151	0.546566	0.250727	0.219208	0.948751	0.652917	0.639344	0.203613	0.873269	0.935705	0.629322	0.586805	0.277419	0.00104312	0.451888
lncRNA.LOC105603075	0.59149	0.670175	0.335965	0.805103	0.736991	0.0665222	0.459429	0.657937	0.749436	0.851433	0.760338	0.381814	0.630622	0.48454	0.124956	0.861273	0.55263	0.618654	0.154638	0.902097	0.989398	0.282117	0.78389	0.0198385	0.316877	0.142278	0.00882953	0.352846	0.595132	0.897127	0.241029	0.456677	0.414085	0.804245	0.520266	0.826464	0.806922	0.120821	0.300408	0.361264	0.503293	0.833928	0.363334	0.113981	0.838962	0.0355516	0.757709	0.24584	0.0624408
lncRNA.LOC105603392	9.80696e-05	0.583475	0.265312	0.639994	0.000303086	0.323144	0.00020799	0.00019418	0.000472622	0.897829	0.46683	0.459623	0.581654	0.000139091	0.00982897	0.102954	0.0412366	0.00599862	0.39305	0.0218243	0.00285592	0.276042	0.34491	0.666028	0.00333299	0.204039	0.602315	0.000665536	4.49312e-05	0.0602116	0.447332	0.481348	0.0471632	0.00277127	0.000215822	0.693819	0.659052	0.385777	2.10529e-05	0.41812	1.34152e-05	0.446875	0.227431	0.418821	0.0380347	0.168956	0.661028	0.112273	0.566353
lncRNA.LOC105603522	0.00402638	0.478677	0.580375	0.41676	0.00442479	0.471802	0.00164812	0.0295012	0.0139665	0.821605	0.458524	0.329887	0.716818	0.00260369	0.300693	0.145204	0.00724694	0.0171349	0.755848	0.0080026	0.00724546	0.737839	0.593872	0.264113	0.00157315	0.975191	0.346353	0.00389564	0.0349975	0.0601347	0.369063	0.503631	0.0676177	0.0123265	9.20175e-05	0.692551	0.139345	0.652129	0.0153761	0.0975181	0.00292742	0.212931	0.103712	0.452644	0.0109534	0.994669	0.854719	0.383598	0.323606
lncRNA.LOC105603774	0.729475	0.890553	0.00766069	0.953274	0.665604	0.170179	0.415895	0.372687	0.332106	0.764536	0.979549	2.20801e-05	0.192936	0.52753	0.827713	0.250486	0.0398835	0.0717637	0.167532	0.0305482	0.399283	0.996297	0.940043	0.325535	0.476167	0.350508	0.433775	0.546759	0.193752	0.351453	0.0236955	0.0861363	0.0032148	0.479687	0.481058	0.74418	0.258591	0.105859	0.397963	0.305071	0.381557	0.0162325	0.835546	0.667857	0.0505736	0.678289	0.98644	0.13755	3.07732e-05
lncRNA.LOC105604459	0.000128893	0.0269212	0.411603	0.0696381	0.00127322	0.0534476	0.0768989	0.000296407	0.00316685	0.0141826	0.041982	0.0389232	1.51676e-05	0.00201826	0.495131	0.15211	1.92492e-09	0.00731043	0.000144617	0.000123	0.00300429	0.0167456	5.68851e-05	0.486144	0.00364616	0.00443885	0.0579239	0.0257349	0.0499845	0.0019979	0.0486897	0.119847	0.764953	0.00600788	0.0541684	0.000259363	0.32279	0.676579	0.0205527	0.730662	0.0137512	0.000644653	0.474713	0.00269437	0.000892255	0.00139093	0.00174433	0.042068	0.572373
lncRNA.LOC105604561	0.289233	0.658333	0.54221	0.43242	0.454402	0.0385013	0.282199	0.392934	0.152032	0.816156	0.691546	0.446578	0.827582	0.194002	0.384075	0.259732	0.72673	0.799917	0.857132	0.8148	0.641827	0.260313	0.982509	0.0351159	0.18347	0.837007	0.343646	0.231349	0.279066	0.991833	0.040609	0.397313	0.416932	0.766173	0.279351	0.67689	0.109337	0.108041	0.319706	0.257097	0.201415	0.2898	0.415107	0.928276	0.424946	0.996231	0.904674	0.700211	0.0170993
lncRNA.LOC105604676	0.138983	0.984355	0.990823	0.408789	0.171883	0.946194	0.345062	0.381875	0.187671	0.953078	0.643284	0.141515	0.558409	0.147604	0.172533	0.000966481	0.74316	0.845702	0.366558	0.567088	0.152099	0.261066	0.79955	0.0159328	0.101535	0.150724	0.786737	0.0944538	0.217524	0.551518	0.56648	0.705405	0.0942189	0.819206	0.382428	0.931815	0.624636	0.0874505	0.685493	0.0304468	0.126552	0.656045	0.754812	0.940153	0.943428	0.930301	0.997351	0.578487	0.406482
lncRNA.LOC105604914	0.341643	0.533626	0.204979	0.534417	0.236668	0.501994	0.436168	0.352009	0.652062	0.95706	0.931105	0.634542	0.807338	0.455247	0.497419	0.71564	0.787396	0.486017	0.970597	0.691282	0.105539	0.960255	0.958135	0.416592	0.146293	0.629769	0.176972	0.376009	0.162545	0.739014	0.0895495	0.0372224	0.143979	0.267459	0.326782	0.864445	0.486677	0.0895353	0.119358	0.638124	0.24427	0.476489	0.978738	0.834361	0.290882	0.750794	0.760007	0.618733	0.489181
lncRNA.LOC105605741	0.763674	0.151017	0.0448727	0.000501591	0.991109	0.0200978	0.340362	0.40627	0.645798	0.000567093	0.0129318	0.00647243	1.45118e-05	0.621304	0.781278	0.321654	0.0135044	0.894293	1.83381e-07	0.574336	0.993655	0.000155488	0.00130249	0.52951	0.871256	3.80821e-06	2.32716e-06	0.269269	0.451433	0.715554	0.0342174	0.0555838	0.0468237	0.540844	0.401469	0.00166587	0.830807	0.322789	0.388848	0.0479306	0.346138	0.0641134	0.723093	4.36875e-05	0.390058	3.81836e-05	0.000202721	0.124215	0.0279133
lncRNA.LOC105608763	1.4873e-07	0.447975	0.463956	0.837187	2.24013e-08	0.97485	0.0433765	1.03579e-06	0.00130261	0.36592	0.752849	0.926215	0.0471899	1.58774e-05	0.241493	0.0836491	0.000914095	0.00128194	0.0674562	0.00017806	0.00102191	0.41569	0.0671658	0.34315	0.00211989	0.226231	0.574339	0.000148717	0.000975361	0.0121975	0.939202	0.88315	0.005906	0.0093947	0.0167731	0.107178	0.160368	0.104428	2.43096e-07	0.063529	7.94751e-05	0.202498	0.374047	0.0822829	0.0177569	0.0170872	0.216973	0.000243574	0.543673
lncRNA.LOC105609047	0.232534	0.776996	0.0824143	0.15745	0.211578	0.0681297	0.358813	0.341041	0.108127	0.614675	0.281727	0.0182421	0.60931	0.134897	0.123927	0.59106	0.46518	0.222987	0.497482	0.931326	0.917616	0.379941	0.575429	0.634867	0.648442	0.257989	0.0856679	0.195152	0.0553516	0.988832	0.025576	0.384748	0.0878746	0.693519	0.314427	0.501344	0.903486	0.0260334	0.181605	0.350043	0.140178	0.98786	0.0468774	0.759157	0.324782	0.735054	0.600506	0.624044	0.000854171
lncRNA.LOC105609681	0.199042	0.216217	0.317593	0.2022	0.0524045	0.828828	0.667881	0.667409	0.580366	0.418093	0.360521	0.605876	0.568484	0.0865609	0.975932	0.153818	0.22484	0.385372	0.577191	0.234592	0.338127	0.215844	0.869888	0.498401	0.131068	0.21048	0.269114	0.0358638	0.564773	0.278559	0.980633	0.303666	0.0688017	0.0429361	0.485202	0.990933	0.174416	0.749099	0.0889154	0.0093591	0.191539	0.824329	0.000149769	0.336699	0.295704	0.628089	0.516025	0.94246	0.611661
lncRNA.LOC105610886	0.22708	0.312669	0.877374	0.727725	0.490058	0.412612	0.524286	0.462193	0.223978	0.617484	0.721597	0.328109	0.573935	0.37612	0.959066	0.981608	0.26405	0.0971409	0.411956	0.402424	0.882847	0.655039	0.563333	0.743514	0.497266	0.73557	0.422224	0.387201	0.77647	0.451212	0.730733	0.948338	0.698592	0.824255	0.420369	0.802602	0.267507	0.236829	0.788988	0.928513	0.537111	0.482455	0.600401	0.84769	0.623789	0.568301	0.787938	0.395517	0.480702
lncRNA.LOC105611269	0.246522	0.434049	0.701854	0.592781	0.203749	0.00897804	0.479751	0.383777	0.308598	0.648753	0.797199	0.518821	0.550255	0.37339	0.298719	0.873597	0.0979029	0.389743	0.453324	0.420162	0.107142	0.219793	0.438239	0.797837	0.180099	0.741214	0.908982	0.375448	0.153988	0.127372	0.0106353	0.0299454	0.303	0.0348134	0.430686	0.856442	0.437498	0.656717	0.221326	0.855542	0.269029	0.628516	0.711569	0.327334	0.376358	0.553598	0.69238	0.377172	0.282039
lncRNA.LOC105611403	0.916314	0.359788	0.0243766	0.352332	0.775011	0.0424413	0.335966	0.659136	0.486578	0.0770466	0.127373	9.25302e-05	0.00874453	0.594396	0.309934	0.14601	0.00254134	0.0698821	0.00286794	0.0155199	0.470362	0.227365	0.0483089	0.457328	0.847231	0.0313201	0.106804	0.512864	0.126689	0.228116	0.00302715	0.0348325	0.00102828	0.119578	0.388865	0.167144	0.416246	0.0529287	0.301599	0.143463	0.310501	0.00061211	0.916216	0.690495	0.00465185	0.259334	0.0554243	0.465977	0.117107
lncRNA.LOC105611558	0.0138071	0.240859	0.342813	0.588504	0.00180868	0.858989	0.318257	0.233645	0.272847	0.487447	0.421209	0.943105	0.900777	0.00381857	0.76307	0.0262953	0.052051	0.0726964	0.645843	0.0656938	0.0956214	0.38676	0.685882	0.134393	0.0106821	0.334051	0.208579	0.000370021	0.188951	0.125569	0.917026	0.573938	0.0589409	0.00809254	0.22313	0.878071	0.211697	0.301533	0.0172493	0.00052121	0.0306442	0.81026	0.0370418	0.38935	0.0633445	0.696483	0.67873	0.74147	0.416673
lncRNA.LOC105611977	0.827904	0.52194	0.644537	0.510374	0.557324	0.0168105	0.289128	0.604611	0.490866	0.017136	0.0617752	0.157023	0.0491737	0.424078	0.222392	0.353679	0.0403654	0.561288	0.0319679	0.232268	0.677066	0.0305948	0.0120912	0.100222	0.763164	0.0440389	0.0288908	0.326572	0.203551	0.28261	0.00108258	0.119613	0.0144757	0.324753	0.279381	0.0698765	0.965884	0.0241394	0.141744	0.176218	0.197505	0.0797615	0.671769	0.228261	0.0196946	0.240213	0.00946315	0.735331	0.274516
lncRNA.LOC105616222	1.03988e-08	0.815329	0.181527	0.941208	7.48203e-06	0.374939	1.48114e-10	2.60521e-09	4.49138e-08	0.644447	0.999274	0.845879	0.196627	5.78859e-08	0.0296797	0.00861539	0.00236071	0.00169986	0.341624	0.00581201	7.04931e-07	0.481588	0.0968456	0.0511676	9.2772e-08	0.413457	0.524474	5.28097e-06	1.93755e-08	0.0183031	0.437294	0.626993	0.0037737	0.0131388	1.13251e-08	0.273031	0.350989	0.143162	6.17817e-07	0.254107	2.77756e-12	0.137396	0.550085	0.399122	0.00511558	0.233751	0.573443	0.0821079	0.606574
lncRNA.LOC105616344	7.5176e-07	0.744755	0.392539	0.881627	2.12685e-10	0.882364	0.0562506	0.00118801	0.00195509	0.804114	0.762809	0.621865	0.184176	8.34414e-10	0.0822065	8.48946e-05	0.0274105	0.0204865	0.89843	0.0999935	0.000845455	0.537034	0.0764764	0.0263523	4.57452e-06	0.993797	0.285215	3.03935e-12	0.000135253	0.0231583	0.749	0.66453	0.000528396	0.00496274	0.0409676	0.593244	0.611197	0.00409741	2.98751e-05	4.88556e-07	7.41521e-05	0.702401	0.541726	0.461597	0.0664085	0.490625	0.513336	0.543854	0.615633
lncRNA.LOC105616808	0.789879	0.000125687	0.249758	0.091192	0.853861	0.569916	0.919294	0.43398	0.75394	0.174568	0.0246765	0.404277	0.274188	0.83546	0.457147	0.652582	0.931799	0.224234	0.450838	0.339796	0.222497	0.155233	0.0965028	0.469137	0.533471	0.228556	0.526637	0.824988	0.798876	0.736389	0.840379	0.945448	0.334405	0.860736	0.92387	0.00477316	0.0743069	0.00684518	0.990876	0.770443	0.830618	0.523371	0.528519	0.0125006	0.524103	0.11488	0.0751819	0.659196	0.647924
lncRNA.LOC106990587	0.11182	0.190786	0.635185	0.185564	0.203611	0.109679	0.873249	0.0919652	0.338025	0.000626537	0.0109011	0.0265477	1.0656e-05	0.238393	0.599266	0.567938	0.000222039	0.0938346	0.000151199	0.00239795	0.271339	9.34274e-05	3.10228e-05	0.459101	0.255314	4.62473e-05	0.0986931	0.60932	0.636611	0.0261952	0.00970466	0.01432	0.103009	0.100128	0.877129	0.000577171	0.640746	0.314181	0.252285	0.42132	0.746289	0.00227797	0.596536	0.0119649	0.00182848	0.0208061	1.93324e-05	0.736718	0.30617
lncRNA.LOC106991082	0.17334	0.0436382	0.140112	0.0887922	0.256388	0.447501	0.263148	0.316502	0.211203	0.755012	0.376038	0.638123	0.708435	0.133161	0.679035	0.601255	0.800238	0.0382978	0.226591	0.19806	0.559235	0.343036	0.972394	0.0376074	0.234167	0.0811352	0.0480906	0.0906965	0.153205	0.721396	0.572924	0.772451	0.430619	0.974545	0.298573	0.258629	0.258182	0.549671	0.15112	0.433763	0.218446	0.808193	0.849083	0.0420292	0.32016	0.0352492	0.815484	0.75544	0.0838878
lncRNA.LOC106991092	0.504231	0.0429594	0.0684009	0.00270862	0.860998	0.0393656	0.848833	0.390365	0.709303	0.0196401	0.0208569	0.00206969	0.000276552	0.954317	0.723536	0.333007	0.00951426	0.951165	4.32507e-07	0.267137	0.910514	0.000997845	0.00203047	0.0934069	0.835549	8.46666e-07	0.000495858	0.602391	0.423508	0.837041	0.0213096	0.0445608	0.100292	0.667084	0.945664	0.000916564	0.991796	0.420324	0.51601	0.165572	0.675856	0.0062506	0.873079	0.000345812	0.275756	8.53522e-06	0.00155772	0.55541	0.00529016
lncRNA.LOC106991289	0.0120838	0.683976	0.957172	0.490153	0.111431	0.174426	0.000666119	0.0230486	0.0303071	0.651547	0.713455	0.323563	0.729861	0.024272	0.302682	0.305808	0.00772443	0.000451626	0.614998	0.00355055	0.0734037	0.47128	0.557238	0.167536	0.0111185	0.883772	0.308738	0.0199045	0.00875524	0.0219114	0.0680271	0.6228	0.998749	0.00195646	0.0286921	0.783981	0.179333	0.488292	0.00766748	0.474687	0.000470554	0.0239984	0.588248	0.389929	0.00124131	0.831934	0.656074	0.296122	0.352988
lncRNA.LOC106991634	0.00160365	0.071768	0.623684	0.436772	0.000276739	0.909429	0.0109264	0.00114509	0.00517901	0.291157	0.0495452	0.786929	0.801483	0.000896483	0.0525831	0.0285662	0.0480311	0.0411984	0.482668	0.0108047	0.00803426	0.782922	0.953019	0.796494	0.044202	0.520078	0.803915	0.00325932	0.00165107	0.107349	0.603127	0.831636	0.0559541	0.0523079	0.00565351	0.844728	0.0143683	0.804803	1.04506e-05	0.156312	0.000153452	0.45714	0.844892	0.704599	0.0335338	0.159846	0.624735	0.00159452	0.71337
lncRNA.LOC106991638	0.72884	0.771729	0.000160905	0.0157429	0.945896	0.0718972	0.667233	0.979051	0.679268	0.298246	0.430125	3.33817e-06	0.0162574	0.959469	0.366932	0.142064	0.00354142	0.261564	0.0122019	0.137635	0.574538	0.362191	0.113946	0.429179	0.257175	0.0751397	0.0595429	0.803152	0.388928	0.291164	0.0107784	0.0834235	0.0272495	0.189147	0.688204	0.238306	0.874267	0.311671	0.46103	0.190998	0.642044	0.0607065	0.989027	0.45326	0.0800427	0.255864	0.124105	0.487857	0.0204213
lncRNA.LOC106991804	4.4118e-07	0.801985	0.413241	0.924972	1.7099e-09	0.672081	0.00550009	6.57039e-07	0.000166647	0.885691	0.537634	0.551284	0.305761	1.14611e-06	0.0796129	0.00400112	0.012201	0.00252499	0.325346	0.0131651	9.62042e-05	0.892648	0.240619	0.0821135	0.000212242	0.839729	0.904893	1.22604e-05	8.68082e-06	0.0449324	0.947739	0.486886	0.00041543	0.00751204	0.00594901	0.24132	0.276088	0.0251473	1.15827e-08	0.0326734	1.45441e-07	0.635826	0.68447	0.223935	0.020291	0.0769599	0.652306	0.000385677	0.237819
pseudogene.XLOC_000058_LOC101119529	0.108008	0.478843	0.247794	0.993198	0.103483	0.683875	0.357183	0.139931	0.0581686	0.909367	0.275166	0.0975926	0.929805	0.134544	0.257431	0.0628409	0.772908	0.980946	0.564926	0.582796	0.396429	0.908524	0.958188	0.536679	0.707538	0.945387	0.504091	0.119421	0.116421	0.035141	0.505287	0.111886	0.0930557	0.383854	0.22672	0.948943	0.280055	0.20234	0.137707	0.192067	0.103331	0.382719	0.184959	0.417648	0.689328	0.165559	0.867391	0.201623	0.723031
pseudogene.XLOC_000644_LOC101121401	2.55211e-09	0.698818	0.319509	0.967235	1.94378e-07	0.302898	0.000695152	4.15461e-05	9.2246e-05	0.279768	0.474666	0.449244	0.022854	6.37516e-10	0.202083	0.00254828	0.000109807	0.00013008	0.338131	0.000885603	4.00832e-05	0.293804	0.00626862	0.0282775	2.33498e-08	0.485798	0.309067	9.20095e-10	7.22442e-05	0.00161062	0.26602	0.898016	0.0354786	0.00063321	0.00120934	0.258298	0.343231	0.12609	3.51092e-05	0.00699126	4.46124e-06	0.0347923	0.562784	0.617972	0.000163569	0.547214	0.21693	0.568948	0.844513
pseudogene.XLOC_000674_LOC106990906	8.33153e-08	0.747667	0.862695	0.463844	8.18566e-07	0.253686	0.000104995	1.05011e-07	2.60797e-05	0.495937	0.917271	0.905827	0.073899	8.2227e-06	0.0669151	0.0609739	0.000161261	0.0010313	0.0259285	0.00184514	4.50655e-05	0.324918	0.057497	0.414779	5.52101e-05	0.092845	0.359807	0.000191939	0.000107186	0.0545526	0.323911	0.864177	0.0151383	0.00102575	4.37474e-05	0.0655092	0.252018	0.148866	1.81003e-05	0.342691	3.28622e-07	0.0849906	0.563069	0.0726031	0.00271533	0.00532318	0.298779	0.00148599	0.843757
pseudogene.XLOC_001369_LOC101110577	0.0954001	0.188464	0.69404	0.0905774	0.285219	0.126622	0.806326	0.151834	0.125778	0.00419226	0.14328	0.352771	0.000338178	0.115031	0.914846	0.630151	0.0136905	0.648121	0.00169745	0.291271	0.262959	0.00100733	2.7883e-05	0.614234	0.178116	0.00907408	0.275702	0.566704	0.393338	0.260019	0.0854168	0.128068	0.378466	0.779088	0.710284	0.000123373	0.889096	0.882593	0.841981	0.890987	0.652319	0.0541046	0.833266	0.00112904	0.10189	0.00759856	2.07685e-06	0.764114	0.585862
pseudogene.XLOC_002740_LOC101103815	0.232574	0.070761	0.204549	0.00224181	0.264501	0.115617	0.821142	0.150132	0.380296	0.0560928	0.192886	0.405138	0.00604955	0.583241	0.789375	0.77619	0.0400514	0.934789	1.36144e-06	0.683357	0.544602	0.00570957	0.0120169	0.0846447	0.676268	1.54905e-05	0.000265279	0.920915	0.983534	0.680794	0.175833	0.330342	0.750689	0.46863	0.897369	0.00033676	0.848859	0.49636	0.875039	0.487823	0.729577	0.101632	0.866011	2.03704e-06	0.586723	2.65001e-11	0.00318037	0.0431496	0.206037
pseudogene.XLOC_003312_LOC101101991	0.802592	0.170322	0.193772	0.709982	0.97607	0.739568	0.82432	0.557113	0.878303	0.204498	0.262097	0.542168	0.274516	0.795923	0.00056135	0.0518951	0.3131	0.186998	0.115881	0.16865	0.246329	0.190303	0.288563	0.00329408	0.639583	0.0942572	0.560227	0.609248	0.666111	0.43045	0.2235	0.844969	0.52799	0.270974	0.69251	0.12106	0.610281	0.835301	0.957123	0.109487	0.998433	0.0469593	0.599823	0.384529	0.254054	0.236401	0.222434	0.499686	0.615096
pseudogene.XLOC_003334_LOC101101991	2.83056e-06	0.677545	0.265927	0.6593	0.000156281	0.445951	5.77134e-11	9.49212e-06	1.98402e-06	0.944816	0.500507	0.954456	0.652649	1.39893e-06	0.0193263	0.00968629	0.0103291	0.00163089	0.769385	0.0124554	3.19731e-05	0.916987	0.310956	0.0448705	1.29163e-06	0.787386	0.219943	1.14506e-05	1.63555e-07	0.0218784	0.462202	0.641518	0.0117416	0.0049507	7.28223e-09	0.72049	0.302035	0.272347	1.6165e-05	0.251945	2.05907e-10	0.153905	0.515408	0.934298	0.00801886	0.724833	0.972356	0.310965	0.313076
pseudogene.XLOC_004148_LOC105610748	0.598674	0.922312	0.0791251	0.325982	0.603486	0.837144	0.951141	0.810843	0.90838	0.365372	0.333703	0.0152843	0.528731	0.955921	0.158937	0.450591	0.0481009	0.0266059	0.215856	0.00427131	0.605646	0.189333	0.490448	0.687182	0.677636	0.982994	0.344393	0.779247	0.823144	0.0617667	0.65058	0.259188	0.364008	0.329556	0.648541	0.638893	0.0232035	0.208575	0.832562	0.464141	0.845427	0.0807101	0.408124	0.566361	0.102747	0.511549	0.471519	0.000102187	0.424164
[truncated: 655 more columns]
