# Supplementary material for: Sheep skeletal muscle transcriptome analysis reveals muscle growth regulatory lncRNAs
Source: PeerJ. 2018 Apr 11;6:e4619. doi: 10.7717/peerj.4619 (PMC5899421; doi:10.7717/peerj.4619)
Supplement: Table S4 — Differentially expressed lncRNAs from Cluster 1, 2 and 3 were contained in. Cis-regulatory genes were identified with 50 k bp upstream or downstream of the lncRNAs and a Pearson correlation p-value <0.001. [file peerj-06-4619-s004.xlsx]

## Sheet: LncRNAs and co-expressed genes
lncRNA_id	Pseudo of gene	Up-regulated in	Cluster	Number of Co-expression Genes	Co-expression Genes	Cis-regulatory genes
LOC105604459	n/a	M&D	1	19	TMEM236,SLC2A11,LRRN1,KCNJ2,NUDT3,PAQR9,B3GLCT,ME2,P2RY1,MARCKSL1,PPP1R3B,KLHL31,LOC101102178,ST8SIA5,MAP3K7CL,ATP2A2,NCEH1,SLC6A1,PPARGC1B	n/a
LOC105610886	n/a	M&D	1	2	RIMS2,RELL1	n/a
LOC105611269	n/a	M&D	1	2	SOCS2,HSD17B12	n/a
LOC105602453	n/a	M&D	2	103	C20H6orf136,GPI,VEGFA,KCNJ12,FOXO6,SERPINH1,CAMK2A,RXRG,SLC2A4,TRIM7,ASS1,ALAS1,LOC101110145,PLXDC1,EML1,NFIX,PC,LOC101110855,SREBF1,GPT2,KIAA1161,MYOZ3,ITGA7,GPRC5C,SMYD1,ZNF827,GPD1,METTL7B,SEMA6C,SCARB1,CARNS1,IER3,SNAI3,GLRX5,KY,CHRNE,CNTNAP1,AXIN2,BCL9L,CD320,ADAMTS16,SEC14L5,FAM78A,CCDC80,ASB12,GAMT,KCNC4,LGALS1,DHRS7B,TMEM52,PGP,DYRK1B,CASQ1,CA14,ALDH2,BHLHE40,LOC101116336,MB,SLC25A25,CDC4…	n/a
LOC105602640	n/a	M&D	2	3	HPDL,SFRP2,XCL1	n/a
LOC105603075	n/a	M&D	2	1	NUDT3	n/a
LOC105603774	n/a	M&D	2	4	DLG2,PFKFB2,ADCY1,ATP2A2	n/a
LOC105604561	n/a	M&D	2	2	TMEM236,SLC2A11	n/a
LOC105604676	n/a	M&D	2	1	GLP2R	n/a
LOC105605741	n/a	M&D	2	59	TRIM7,JPH2,ORAI1,AHDC1,KCNC4,FOXO6,GRIP2,SREBF1,MAPK4,ORMDL3,SLC6A1,AMPD1,CFAP52,SEC14L5,FAM43B,GPD1,TMEM52,MB,CARNS1,AMOTL1,PDE8B,IGFBP5,AXIN2,PLEKHH3,SLC25A25,GPRC5C,BCL9L,FAM78A,ADHFE1,METTL7B,TNNI1,MYH7B,EML1,SLC25A13,LOC105615769,MYH7,LOC101108463,FZD7,LOC101102638,P2RY2,CSRP2,KY,DMPK,LOC101116336,ASB16,PC,THRB,PLXDC1,ASB12,SEMA6C,ETNPPL,MYOD1,SLC27A1,SNAI3,RNF122,SLC25A29,LSMEM1,TNNC1,SERPI…	n/a
LOC105611403	n/a	M&D	2	3	MAF,PFKFB2,DLG2	n/a
LOC105611977	n/a	M&D	2	2	SLC6A1,PLEKHH3	n/a
LOC105616808	n/a	M&D	2	3	TGM1,LOC106991667,CASQ1	n/a
LOC106990587	n/a	M&D	2	23	CLSTN2,CAMK2G,EML1,GSTT2B,NT5C1A,ADHFE1,LOC101109746,MYH7,GCAT,ASS1,FZD7,SEMA4D,LOC101108105,CNTNAP1,ALDH2,DYRK1B,MMP15,AMOTL1,PC,MYOZ3,CARNS1,ITGA7,IRF1	TRIM7
LOC106991082	n/a	M&D	2	1	RAI14	n/a
LOC106991092	n/a	M&D	2	64	LOC105615769,IGFBP5,MB,TNNI1,LOC101116336,LOC105603989,MYH7B,SNAI3,KCNN1,P2RY2,CSRP2,S100A1,GPD1,SEC14L5,LOC101108463,SLC25A13,TNNC1,ZNF827,AHDC1,BHLHE40,FOXO6,SEMA4D,AMOTL1,GPRC5C,TP53I11,ORAI1,JPH2,KLHL33,BCL9L,CFAP52,TRIM7,MYH7,CCDC88C,FAM43B,MAPK4,MYOD1,SLC25A25,PFKFB2,TPM3,MYL2,SREBF1,KCNC4,PLEKHH3,ASB16,CCR8,ORMDL3,AXIN2,CCDC28B,IRS1,SLC27A1,VEGFA,PDE8B,DLG2,C20H6orf136,KY,CRY2,LOC101102638…	n/a
LOC106991638	n/a	M&D	2	2	ADCY1,PLEKHA6	n/a
pseudogene.XLOC_001369_LOC101110577	ATP11C	M&D	2	39	NUAK2,CA14,MMP15,XCR1,CCR8,GAMT,CHRNE,RXRG,GPT2,ITGA7,ASS1,PGP,KIAA1161,MYOZ3,CNTNAP1,LOC105608996,PPM1J,GLRX5,LOC101106024,IVD,SLC27A1,KCNS3,KY,FGFRL1,GPD1,SLC25A25,CD320,GCAT,BHLHE40,ALDH2,PCDH12,LOC101109746,DYRK1B,LOC101110145,NFIX,PC,CARNS1,GSTT2B,MYOD1	n/a
pseudogene.XLOC_002740_LOC101103815	TPI1	M&D	2	41	ASB16,ORAI1,TNNI1,LOC105603989,SNAI3,IGFBP5,LOC105615769,BCL9L,MB,CSRP2,FOXO6,KCNN1,ZNF827,GPRC5C,SEC14L5,TMEM52,C20H6orf136,BHLHE40,CCDC28B,AHDC1,TP53I11,ASB12,SREBF1,SLC25A13,KCNC4,P2RY2,SLC25A25,GPD1,CAMK2A,MYH7B,AMOTL1,SEMA4D,GRIP2,LOC101108463,LOC101102638,VEGFA,TRIM7,LOC101116336,SERPINH1,CCDC88C,KLHL33	n/a
LOC105603392	n/a	S	3	25	CTSH,GADD45G,LOC101117299,ARRDC2,FOXS1,MUSTN1,MYF6,ARMC12,LOC106991529,MLYCD,UCK2,RGCC,FLNC,NRAP,STK10,ZBTB16,ANGPTL4,LOC101121539,LOC105602659,KLHL40,DUSP15,S100A13,LMOD2,MAP3K14,SLC29A2	KLHL40
LOC105603522	n/a	S	3	9	SH2D4A,LOC106991529,ECHDC3,GALNT15,CCDC40,PAPSS2,IGF1R,GRAMD1B,PKHD1	n/a
LOC105608763	n/a	S	3	88	ZNF385C,LRCH4,PFKFB3,MCOLN1,LOC106991400,ACACB,FAM222B,SLC29A2,GBGT1,GPX3,CDH15,GMPR,FOXO3,AATF,TRIM54,LOC101105484,MLYCD,ARMC12,MFSD12,UBXN10,TACC2,BNIP3,PNPLA2,GADD45A,WBP1L,ACTR3B,MAX,GATSL2,TBC1D17,SLC15A4,CDKN1A,FURIN,LOC101121539,C3H12orf10,IRX3,CD276,CHI3L1,LOC101122777,FNTB,DNTTIP1,LMOD2,LOC101117299,PES1,IKBKG,MTMR14,KAT2A,CTSH,GREB1,CSNK1D,SMTNL1,SLC43A2,SCUBE2,MIF4GD,TMEM201,NOL6,LPIN1…	n/a
LOC105609681	n/a	S	3	4	PAPSS2,PGBD5,DDO,STRIP2	n/a
LOC105611558	n/a	S	3	4	SSH2,PAPSS2,DDO,RPP38	n/a
LOC105616222	n/a	S	3	126	FOXS1,MUSTN1,CRABP2,UCK2,ARRDC2,LOC105602659,GADD45G,LOC106991529,STK10,DUSP15,LOC101117299,MYF6,NRAP,ZBTB16,ACTC1,FLNC,KLHL40,FAM107A,PDLIM3,LOC101121539,SMTNL1,GATSL2,SLC25A42,KLHL30,ACTR3B,UBXN10,PPL,LOC101105484,CHI3L1,MAP3K14,IGF1R,FTH1,AATF,TACC2,AQP3,LMOD2,CDH4,ANGPTL4,PLCD3,SH2D4A,MAP1LC3A,ADAMTS10,ADIPOR2,OLFM1,TRMT1,ALS2CL,LPIN1,PITX3,LRP4,FNTB,CDH15,S100A13,GPX3,UBE2Q1,RUVBL1,SLC29A2,T…	n/a
LOC105616344	n/a	S	3	113	TRIM63,STAT5A,NPC1,PFKFB4,SLC3A2,NOB1,LOC101120716,SLC25A33,SLC43A2,STAT5B,HMOX1,HMOX2,CHAD,TNS3,TWF2,RPP38,TFAP4,MTMR14,FOXO3,AMPD3,XKR6,MAX,SCN3B,CCDC86,MTHFR,SCPEP1,IKBKG,THOP1,CSNK1D,NOP2,PES1,KAT2A,WDR4,CDC26,ACACB,FNTB,ADIPOR2,POLR3D,QSOX2,FURIN,C3H12orf10,BNIP3,GLUL,ECE2,TBC1D17,GMPR,FTSJ3,LRP4,SLC15A4,BTG1,PFKFB3,NT5C3B,ECE1,PDLIM3,MIF4GD,TACC2,LPIN1,RUVBL1,UBXN10,FAM20A,TRMT1,SLC7A6,UBE2…	n/a
LOC106991289	n/a	S	3	2	GDNF,WDR91	n/a
LOC106991634	n/a	S	3	12	WBP1L,ARMC12,LOC105603631,LOC106991400,SLC29A2,GALNT15,LRCH4,LOC101121539,GADD45G,LOC105602659,PFKFB3,CDKN1A	n/a
LOC106991804	n/a	S	3	124	PFKFB3,ZNF385C,LRCH4,LOC101121539,MCOLN1,ACACB,CDKN1A,GPX3,SLC29A2,GMPR,ARMC12,TRIM54,FOXO3,GBGT1,MLYCD,WBP1L,LOC106991400,LOC101122777,LOC101105484,TACC2,UBXN10,MAX,CDH15,BNIP3,GATSL2,ARRDC2,FAM222B,GADD45A,CHI3L1,GADD45G,PNPLA2,LOC101117299,SLC43A2,DNTTIP1,AATF,MFSD12,FNTB,LPIN1,TMEM201,ACTR3B,FURIN,PITX3,SMTNL1,NRAP,TBC1D17,IRX3,CD276,PDLIM3,ADIPOR2,LOC105603631,KLHL30,MIF4GD,LMOD2,PFKFB4,C3H1…	ARMC12
pseudogene.XLOC_000644_LOC101121401	FTH1	S	3	123	CCDC86,THOP1,TRMT1,S100A13,NOP2,HMOX1,IGF1R,PES1,STAT5B,TWF2,ECE1,ADIPOR2,TBC1D17,UBXN10,KAT2A,AMPD3,IKBKG,SCN3B,LPIN1,RUVBL1,TNS3,TACC2,CSNK1D,LOC106991529,NOB1,AATF,MTHFR,PDLIM3,SLC43A2,FNTB,LRP4,C3H12orf10,HMOX2,DUSP15,FTH1,STK10,MAP1LC3A,SCPEP1,UBE2Q1,TFAP4,QSOX2,CDH15,MTMR14,SH2D4A,CHI3L1,CDC26,ALS2CL,DDX27,MAX,FAM20A,NOL6,GMPR,FOXO3,IPO4,POLR3D,STAT5A,TRIM63,CHAD,TRIM54,MYF6,NPC1,GPATCH4,UC…	n/a
pseudogene.XLOC_000674_LOC106990906	UBE2N	S	3	111	SLC29A2,GPX3,LOC101121539,GADD45G,PPL,GATSL2,MYF6,LOC105603631,LOC101105484,IGF1R,LMOD2,CDKN1A,LOC105602659,MCOLN1,FOXS1,LOC106991400,LRCH4,TACC2,LOC101117299,CDH15,GBGT1,NRAP,CHI3L1,AATF,STK10,ACTR3B,GADD45A,PNPLA2,MLYCD,ZBTB16,SLC25A42,TRIM54,ARRDC2,LOC106991529,EIF4EBP1,OLFM1,SMTNL1,BNIP3,GMPR,ACACB,FAM107A,TMEM201,CD276,HIF3A,KLHL40,UBXN10,DDX27,MUSTN1,PDLIM3,SH2D4A,FAM222B,ST3GAL2,NSMAF,MFSD…	n/a
pseudogene.XLOC_003334_LOC101101991	AP2B1	S	3	88	MUSTN1,UCK2,FOXS1,LOC106991529,ACTC1,CRABP2,ARRDC2,LOC105602659,ZBTB16,GADD45G,FLNC,AQP3,DUSP15,STK10,KLHL40,FAM107A,MYF6,PDLIM3,LOC101117299,SH2D4A,KLHL30,LOC101121539,IGF1R,ANGPTL4,NRAP,SLC25A42,MAP3K14,LPIN1,OLFM1,CHI3L1,PPL,ALS2CL,ADIPOR2,ECHDC3,PLCD3,ADAMTS10,GATSL2,UBXN10,TACC2,S100A13,FTH1,SPIDR,CCDC40,SMTNL1,AATF,LRP4,CDH4,THOP1,MAP1LC3A,TRMT1,WDR91,PITX3,HMOX1,FNTB,LMOD2,LOC101105484,UBE…	n/a
