# Supplementary material for: Sheep skeletal muscle transcriptome analysis reveals muscle growth regulatory lncRNAs
Source: PeerJ. 2018 Apr 11;6:e4619. doi: 10.7717/peerj.4619 (PMC5899421; doi:10.7717/peerj.4619)
Supplement: Table S5 — Interaction degree and MCODE score of 391 nodes were obtained with Cytoscape 3.5.1. All nodes were ranked with interaction degree. [file peerj-06-4619-s005.xlsx]

## Sheet: Sheet1
Node ID	MCODE score	Interaction degree	Type	Higher expressed in
pseudogene.XLOC_000644_LOC101121401	7.56364	127	lncRNA	lower production group
LOC105616222	7	126	lncRNA	lower production group
LOC106991804	6	124	lncRNA	lower production group
LOC105616344	7.56364	113	lncRNA	lower production group
pseudogene.XLOC_000674_LOC106990906	1.6	111	lncRNA	lower production group
LOC105602453	1.38235	103	lncRNA	higher production group
LOC105608763	5	88	lncRNA	lower production group
pseudogene.XLOC_003334_LOC101101991	5	88	lncRNA	lower production group
LOC106991092	6	64	lncRNA	higher production group
LOC105605741	3.73333	59	lncRNA	higher production group
pseudogene.XLOC_002740_LOC101103815	0.857143	41	lncRNA	higher production group
pseudogene.XLOC_001369_LOC101110577	3	39	lncRNA	higher production group
ACACB	4.30769	37	gene	lower production group
IGF1R	3.86029	27	gene	lower production group
CDKN1A	4.2	26	gene	lower production group
LOC105603392	0.0769231	25	lncRNA	lower production group
MYOD1	5.33333	25	Gene	higher production group
FOXO3	2.63241	24	gene	lower production group
LOC106990587	3	23	lncRNA	higher production group
NOP2	8.45455	22	gene	lower production group
PES1	8.45455	22	gene	lower production group
AATF	8.45455	22	gene	lower production group
IRS1	5	21	Gene	higher production group
SLC2A4	2.52381	20	Gene	higher production group
MYOG	5.33333	20	Gene	higher production group
STAT5B	4.36364	19	gene	lower production group
SREBF1	4.02778	19	Gene	higher production group
ACTC1	6	18	gene	lower production group
MYF6	4.46429	18	gene	lower production group
HMOX1	2.88462	18	gene	lower production group
DDX27	8.45455	17	gene	lower production group
EIF4EBP1	2.10256	17	gene	lower production group
NOL6	8.67273	16	gene	lower production group
FTH1	4	16	gene	lower production group
MYH7	4.54545	16	Gene	higher production group
NOP14	8.45455	15	gene	lower production group
TRMT1	7.82222	15	gene	lower production group
TRIM63	4.7619	15	gene	lower production group
TNNI1	5.40909	15	Gene	higher production group
PC	2.24242	15	Gene	higher production group
VEGFA	4.46429	15	Gene	higher production group
ATP2A2	5	15	Gene	higher production group
CCND3	2.4	14	gene	lower production group
FTSJ3	8.45455	14	gene	lower production group
PNPLA2	4.7619	14	gene	lower production group
FLNC	1.58333	14	gene	lower production group
KAT2A	3.22222	14	gene	lower production group
MAP1LC3A	2.80303	14	gene	lower production group
MYH7B	5.78571	14	Gene	higher production group
STAT5A	4.46429	13	gene	lower production group
LPIN1	5	13	gene	lower production group
FURIN	2.85714	13	gene	lower production group
RUVBL1	3.09091	13	gene	lower production group
MAX	3	13	gene	lower production group
GMPR	2.66667	13	gene	lower production group
ZBTB16	3.92727	13	gene	lower production group
WDR4	8.67273	13	gene	lower production group
TNNT1	5.57143	13	Gene	higher production group
MYL2	4.54545	13	Gene	higher production group
DLG2	2.7	13	Gene	higher production group
MB	3.46667	13	Gene	higher production group
SLC27A1	4.02778	13	Gene	higher production group
LOC106991634	2	12	lncRNA	lower production group
LOC105604459	0.153846	12	lncRNA	higher production group
NOB1	7.82222	12	gene	lower production group
ADIPOR2	4	11	gene	lower production group
TNNC1	5.78571	11	Gene	higher production group
SLC3A2	2	10	gene	lower production group
BNIP3	1.66667	10	gene	lower production group
MAP1LC3B	2.7	10	gene	lower production group
CSNK1D	0.928571	10	gene	lower production group
CDH15	1.53333	10	gene	lower production group
LMOD2	0.181818	10	gene	lower production group
ACTR3B	3	10	gene	lower production group
IPO4	5.78571	10	gene	lower production group
ECE1	2.85714	10	gene	lower production group
ARMC12	0.181818	10	gene	lower production group
GPI	3.14286	10	Gene	higher production group
MAPK4	1.4	10	Gene	higher production group
LOC105603522	0.2	9	lncRNA	lower production group
LOC105611403	0.2	9	lncRNA	higher production group
LOC101121539	0.2	9	gene	lower production group
GADD45A	3.55556	9	gene	lower production group
GADD45G	2.4	9	gene	lower production group
GPX3	0.928571	9	gene	lower production group
MLYCD	3	9	gene	lower production group
CDH4	0.833333	9	gene	lower production group
SLC43A2	3	9	gene	lower production group
RPP38	4.7619	9	gene	lower production group
TRIM54	2.4	9	gene	lower production group
SCPEP1	2.2	9	gene	lower production group
DUSP15	0.928571	9	gene	lower production group
PFKFB3	0.2	9	gene	lower production group
TBC1D17	0.833333	9	gene	lower production group
TPM3	5.78571	9	Gene	higher production group
TPI1	3.42857	9	Gene	higher production group
GAMT	7	9	Gene	higher production group
PDP1	2.14286	9	Gene	higher production group
LOC106991529	0.222222	8	gene	lower production group
NRAP	0.222222	8	gene	lower production group
HMOX2	1.92857	8	gene	lower production group
POLR3D	2.4	8	gene	lower production group
S100A13	1.2	8	gene	lower production group
TACC2	0.928571	8	gene	lower production group
SH2D4A	0.928571	8	gene	lower production group
CHI3L1	0.222222	8	gene	lower production group
CARNS1	2.4	8	Gene	higher production group
DGAT2	4.7619	8	Gene	higher production group
P2RY2	4	8	Gene	higher production group
BHLHE40	2.4	8	Gene	higher production group
SCARB1	3.73333	8	Gene	higher production group
GPD1	4	8	Gene	higher production group
GPT2	3.42857	8	Gene	higher production group
CTSH	0.25	7	gene	lower production group
LOC101117299	0.25	7	gene	lower production group
STK10	0.25	7	gene	lower production group
MAP3K14	0.25	7	gene	lower production group
SLC29A2	0.25	7	gene	lower production group
LOC101105484	0.25	7	gene	lower production group
UBXN10	0.25	7	gene	lower production group
GATSL2	0.25	7	gene	lower production group
FNTB	0.25	7	gene	lower production group
SMTNL1	0.25	7	gene	lower production group
MIF4GD	0.25	7	gene	lower production group
GPATCH4	0.25	7	gene	lower production group
PDLIM3	0.25	7	gene	lower production group
LRP4	0.25	7	gene	lower production group
THOP1	0.25	7	gene	lower production group
PABPC1	1.2	7	gene	lower production group
CRABP2	2.4	7	gene	lower production group
AMPD3	0.928571	7	gene	lower production group
TWF2	2	7	gene	lower production group
IKBKG	2.4	7	gene	lower production group
NOD2	1.85714	7	gene	lower production group
SLC15A4	1.66667	7	gene	lower production group
MTMR14	2	7	gene	lower production group
MTHFR	0.25	7	gene	lower production group
ALAS1	1.4	7	Gene	higher production group
KCNC4	2	7	Gene	higher production group
CAMK2A	1.2	7	Gene	higher production group
CCR8	2	7	Gene	higher production group
DYRK1B	1.2	7	Gene	higher production group
KY	2.4	7	Gene	higher production group
FZD7	1.04762	7	Gene	higher production group
ASS1	2.4	7	Gene	higher production group
AXIN2	1.2	7	Gene	higher production group
ARRDC2	0.285714	6	gene	lower production group
FOXS1	0.285714	6	gene	lower production group
MUSTN1	0.285714	6	gene	lower production group
LOC105602659	0.285714	6	gene	lower production group
KLHL40	0.285714	6	gene	lower production group
ECHDC3	0.285714	6	gene	lower production group
LOC106991400	0.285714	6	gene	lower production group
C3H12orf10	0.285714	6	gene	lower production group
SCUBE2	0.285714	6	gene	lower production group
QSOX2	0.285714	6	gene	lower production group
FAM107A	0.285714	6	gene	lower production group
UBE2Q1	0.285714	6	gene	lower production group
NSMAF	0.285714	6	gene	lower production group
ALAD	1.4	6	gene	lower production group
CDC26	1.4	6	gene	lower production group
NPC1	3	6	gene	lower production group
CHAD	0.285714	6	gene	lower production group
DDO	0.285714	6	gene	lower production group
GLUL	3	6	gene	lower production group
ANGPTL4	1.66667	6	gene	lower production group
PITX3	0.285714	6	gene	lower production group
ALS2CL	0.285714	6	gene	lower production group
XCL1	4	6	Gene	higher production group
IRF1	3	6	Gene	higher production group
ADCY1	0.285714	6	Gene	higher production group
CAMK2G	1.04762	6	Gene	higher production group
PLXDC1	2	6	Gene	higher production group
IGFBP5	1.66667	6	Gene	higher production group
ALDH2	2	6	Gene	higher production group
FGFRL1	3	6	Gene	higher production group
LOC105611977	0.333333	5	lncRNA	higher production group
UCK2	0.333333	5	gene	lower production group
GALNT15	0.333333	5	gene	lower production group
LRCH4	0.333333	5	gene	lower production group
WBP1L	0.333333	5	gene	lower production group
LOC101122777	0.333333	5	gene	lower production group
DNTTIP1	0.333333	5	gene	lower production group
LOC105603631	0.333333	5	gene	lower production group
WDR91	0.333333	5	gene	lower production group
FAM20A	0.333333	5	gene	lower production group
SOCS2	4	5	gene	lower production group
HIF3A	2	5	gene	lower production group
PLCD3	2	5	gene	lower production group
DGKD	1.2	5	gene	lower production group
TNS3	1.4	5	gene	lower production group
PDK4	2	5	gene	lower production group
CCDC86	1.4	5	gene	lower production group
GBGT1	0.333333	5	gene	lower production group
MCOLN1	1.2	5	gene	lower production group
PFKFB4	0.333333	5	gene	lower production group
SLC25A25	0.333333	5	Gene	higher production group
AMOTL1	0.333333	5	Gene	higher production group
XCR1	4	5	Gene	higher production group
AMPD1	1.2	5	Gene	higher production group
CRY2	1.4	5	Gene	higher production group
GCAT	1.66667	5	Gene	higher production group
UTS2R	4	5	Gene	higher production group
ITGA7	0.333333	5	Gene	higher production group
AHDC1	0.333333	5	Gene	higher production group
SEC14L5	0.333333	5	Gene	higher production group
LOC105609681	0.4	4	lncRNA	lower production group
LOC105611558	0.4	4	lncRNA	lower production group
LOC105603774	0.4	4	lncRNA	higher production group
ZNF385C	0.4	4	gene	lower production group
FAM222B	0.4	4	gene	lower production group
MFSD12	0.4	4	gene	lower production group
CD276	0.4	4	gene	lower production group
GREB1	0.4	4	gene	lower production group
TMEM201	0.4	4	gene	lower production group
SLC25A33	0.4	4	gene	lower production group
SLC25A42	0.4	4	gene	lower production group
KLHL30	0.4	4	gene	lower production group
SPIDR	0.4	4	gene	lower production group
LOC101105809	0.4	4	gene	lower production group
SCN3B	0.4	4	gene	lower production group
ST3GAL2	0.4	4	gene	lower production group
GDNF	0.4	4	gene	lower production group
DDIT4L	2	4	gene	lower production group
ADAMTS10	1.4	4	gene	lower production group
SSH2	2	4	gene	lower production group
CRYL1	1.4	4	gene	lower production group
PPL	0.4	4	gene	lower production group
ECE2	1.4	4	gene	lower production group
FOXO6	0.4	4	Gene	higher production group
TRIM7	0.4	4	Gene	higher production group
GPRC5C	0.4	4	Gene	higher production group
SNAI3	0.4	4	Gene	higher production group
BCL9L	0.4	4	Gene	higher production group
LOC101116336	0.4	4	Gene	higher production group
LOC101108463	0.4	4	Gene	higher production group
CSRP2	0.4	4	Gene	higher production group
ASB16	0.4	4	Gene	higher production group
SEMA4D	0.4	4	Gene	higher production group
ME2	4	4	Gene	higher production group
RXRG	0.4	4	Gene	higher production group
THRB	0.4	4	Gene	higher production group
GSTT2B	0.4	4	Gene	higher production group
NT5C1A	1.66667	4	Gene	higher production group
P2RY1	4	4	Gene	higher production group
NFIX	0.4	4	Gene	higher production group
MYOZ3	0.4	4	Gene	higher production group
SERPINH1	0.4	4	Gene	higher production group
ORMDL3	0.4	4	Gene	higher production group
SLC25A13	0.4	4	Gene	higher production group
CD320	3	4	Gene	higher production group
KCNJ12	1.66667	4	Gene	higher production group
MAF	0.4	4	Gene	higher production group
MMP15	0.4	4	Gene	higher production group
ORAI1	0.4	4	Gene	higher production group
FAM43B	1.4	4	Gene	higher production group
SLC6A1	0.4	4	Gene	higher production group
PFKFB2	0.4	4	Gene	higher production group
LOC105602640	0.5	3	lncRNA	higher production group
LOC105616808	0.5	3	lncRNA	higher production group
LOC106991638	0.5	3	lncRNA	higher production group
CCDC40	0.5	3	gene	lower production group
PAPSS2	0.5	3	gene	lower production group
GRAMD1B	0.5	3	gene	lower production group
IRX3	0.5	3	gene	lower production group
CNRIP1	0.5	3	gene	lower production group
AQP3	0.5	3	gene	lower production group
OLFM1	0.5	3	gene	lower production group
SPECC1	0.5	3	gene	lower production group
XKR6	0.5	3	gene	lower production group
SLC7A6	3	3	gene	lower production group
POLR2D	0.5	3	gene	lower production group
TFAP4	2	3	gene	lower production group
IL6R	0.5	3	gene	lower production group
UNKL	0.5	3	gene	lower production group
RGCC	2	3	gene	lower production group
BTG1	0.5	3	gene	lower production group
UGP2	0.5	3	gene	lower production group
STRIP2	0.5	3	gene	lower production group
LRRC2	0.5	3	gene	lower production group
PKHD1	0.5	3	gene	lower production group
C20H6orf136	0.5	3	Gene	higher production group
EML1	0.5	3	Gene	higher production group
ZNF827	0.5	3	Gene	higher production group
CNTNAP1	0.5	3	Gene	higher production group
ASB12	0.5	3	Gene	higher production group
TMEM52	0.5	3	Gene	higher production group
CFAP52	0.5	3	Gene	higher production group
TP53I11	0.5	3	Gene	higher production group
CCDC88C	0.5	3	Gene	higher production group
GRIP2	0.5	3	Gene	higher production group
PLEKHH3	0.5	3	Gene	higher production group
LOC105615769	0.5	3	Gene	higher production group
LOC101102638	0.5	3	Gene	higher production group
TOB1	2	3	Gene	higher production group
SMYD1	1.66667	3	Gene	higher production group
S100A1	0.5	3	Gene	higher production group
PDE8B	0.5	3	Gene	higher production group
LGALS1	0.5	3	Gene	higher production group
PPARGC1B	0.5	3	Gene	higher production group
SFRP2	2	3	Gene	higher production group
DHRS7B	2	3	Gene	higher production group
CASQ1	0.5	3	Gene	higher production group
JPH2	0.5	3	Gene	higher production group
GLRX5	0.5	3	Gene	higher production group
CLSTN2	1.66667	3	Gene	higher production group
ADHFE1	2	3	Gene	higher production group
KIAA1161	0.5	3	Gene	higher production group
LOC106991289	0.666667	2	lncRNA	lower production group
LOC105604561	0.666667	2	lncRNA	higher production group
LOC101120716	0.666667	2	gene	lower production group
NT5C3B	0.666667	2	gene	lower production group
CCDC137	0.666667	2	gene	lower production group
CDCA7	2	2	gene	lower production group
METTL3	0.666667	2	gene	lower production group
SFMBT1	0.666667	2	gene	lower production group
PDK3	0.666667	2	gene	lower production group
BTNL9	0.666667	2	gene	lower production group
ANO6	0.666667	2	gene	lower production group
LOC101110145	0.666667	2	Gene	higher production group
METTL7B	0.666667	2	Gene	higher production group
SEMA6C	0.666667	2	Gene	higher production group
CHRNE	0.666667	2	Gene	higher production group
FAM78A	0.666667	2	Gene	higher production group
PGP	0.666667	2	Gene	higher production group
CA14	0.666667	2	Gene	higher production group
SLC25A29	0.666667	2	Gene	higher production group
NUAK2	0.666667	2	Gene	higher production group
LOC101106024	0.666667	2	Gene	higher production group
PCDH12	0.666667	2	Gene	higher production group
DMPK	0.666667	2	Gene	higher production group
LOC101109746	0.666667	2	Gene	higher production group
LOC105603989	0.666667	2	Gene	higher production group
KCNN1	0.666667	2	Gene	higher production group
KLHL33	0.666667	2	Gene	higher production group
CCDC28B	0.666667	2	Gene	higher production group
RAB3A	0.666667	2	Gene	higher production group
KCNJ2	0.666667	2	Gene	higher production group
KCNS3	0.666667	2	Gene	higher production group
GLP2R	0.666667	2	Gene	higher production group
IVD	0.666667	2	Gene	higher production group
DHDH	2	2	Gene	higher production group
IER3	0.666667	2	Gene	higher production group
PPM1J	0.666667	2	Gene	higher production group
TGM1	0.666667	2	Gene	higher production group
ARHGAP23	2	2	Gene	higher production group
SLC12A2	0.666667	2	Gene	higher production group
LOC105603075	0	1	lncRNA	higher production group
LOC105604676	0	1	lncRNA	higher production group
LOC106991082	0	1	lncRNA	higher production group
PGBD5	0	1	gene	lower production group
ARMC2	0	1	gene	lower production group
LOC105610521	0	1	gene	lower production group
EDEM1	0	1	gene	lower production group
NMT2	0	1	gene	lower production group
MCM9	0	1	gene	lower production group
ACAD11	0	1	gene	lower production group
PTGES3L	0	1	gene	lower production group
KLF9	0	1	gene	lower production group
FAM13A	0	1	gene	lower production group
KLF11	0	1	gene	lower production group
SEPSECS	0	1	gene	lower production group
NCEH1	0	1	gene	lower production group
RELL1	0	1	gene	lower production group
LOC101110855	0	1	Gene	higher production group
ADAMTS16	0	1	Gene	higher production group
CCDC80	0	1	Gene	higher production group
CDC42EP2	0	1	Gene	higher production group
PRUNE	0	1	Gene	higher production group
PITX1	0	1	Gene	higher production group
RGMA	0	1	Gene	higher production group
CD93	0	1	Gene	higher production group
MVB12B	0	1	Gene	higher production group
HPDL	0	1	Gene	higher production group
NUDT3	0	1	Gene	higher production group
TMEM236	0	1	Gene	higher production group
SLC2A11	0	1	Gene	higher production group
ETNPPL	0	1	Gene	higher production group
RNF122	0	1	Gene	higher production group
LSMEM1	0	1	Gene	higher production group
LOC106991667	0	1	Gene	higher production group
LOC101108105	0	1	Gene	higher production group
RAI14	0	1	Gene	higher production group
LOC101107541	0	1	Gene	higher production group
RNF207	0	1	Gene	higher production group
PLEKHA6	0	1	Gene	higher production group
LOC105608996	0	1	Gene	higher production group
LIMCH1	0	1	Gene	higher production group
RIMS2	0	1	Gene	higher production group
ST8SIA5	0	1	Gene	higher production group
HSD17B12	0	1	Gene	higher production group
